# Supplementary material for: Frequency and signature of somatic variants in 1461 human brain exomes
Source: PubMed Central journal article supplement (PMC6544539; doi:10.1038/s41436-018-0274-3), 2018-09-14
Supplement: EMS79744-supplement-Supplementary_data.pdf [file EMS79744-supplement-Supplementary_data.pdf]

## Supplementary Data

**Supplementary Table 1. Clinical and demographic details of all samples within the study.**

| <b>Disease Group</b>       | <b>Total cohort</b> | <b>Male (n) (%)</b> | <b>Female (n) (%)</b> | <b>Age onset (years) (SD)</b> | <b>Age Death (years) (SD)</b> | <b>Disease duration (years)</b> |
|----------------------------|---------------------|---------------------|-----------------------|-------------------------------|-------------------------------|---------------------------------|
| <b>Alzheimer's disease</b> | 277                 | 131 (47.3)          | 146 (52.7)            | 65.4 (10.2)                   | 77.7 (11.7)                   | 7.3 (4.7)                       |
| <b>CJD</b>                 | 228                 | 123 (53.9)          | 105 (46.1)            | 52.0 (20.1)                   | 53.0 (19.6)                   | 1.0 (1.0)                       |
| <b>Control</b>             | 362                 | 232 (64.1)          | 130 (35.9)            | N/A                           | 63.3 (18.9)                   | N/A                             |
| <b>FTD-ALS</b>             | 244                 | 143 (58.6)          | 101 (41.4)            | 59.4 (11.8)                   | 64.6 (11.7)                   | 6.5 (5.6)                       |
| <b>Other</b>               | 253                 | 131 (51.8)          | 122 (48.2)            | 66.7 (20.2)                   | 79.7 (14.3)                   | 10.6 (15.8)                     |
| <b>PD-DLB</b>              | 97                  | 64 (66.0)           | 33 (34.0)             | 63.7 (10.1)                   | 74.9 (8.2)                    | 9.2 (5.8)                       |
| <b>Total</b>               | 1461                | 824                 | 637                   | 59.3 (17.8)                   | 68.2 (18.0)                   | 5.6 (8.9)                       |

Abbreviations: CJD, Creutzfeldt Jakob Disease; FTD-ALS, Frontotemporal dementia – Amyotrophic lateral sclerosis; PD-DLB, Parkinson's disease – Dementia with Lewy Bodies.

**Supplementary Table 2. Detected putative somatic variants from exome sequencing**

| No. | Chr   | Pos       | Ref | Alt | VAF    | Gene name | Nonsynonymous/<br>synonymous SNV | Validation<br>outcome |
|-----|-------|-----------|-----|-----|--------|-----------|----------------------------------|-----------------------|
| 1   | chr1  | 17570577  | T   | C   | 25.29% | PADI1     | nonsynonymous SNV                | Validated             |
| 2   | chr1  | 24125194  | G   | A   | 21.67% | GALE      | nonsynonymous SNV                | Validated             |
| 3   | chr1  | 43166558  | C   | T   | 17.57% | YBX1      | nonsynonymous SNV                | Technical failure     |
| 4   | chr1  | 46872017  | C   | T   | 19.67% | FAAH      | nonsynonymous SNV                | Heterozygous          |
| 5   | chr1  | 108742671 | T   | G   | 27.19% | SLC25A24  | synonymous SNV                   | Heterozygous          |
| 6   | chr1  | 228447313 | C   | G   | 28.26% | OBSCN     | nonsynonymous SNV                | Technical failure     |
| 7   | chr1  | 248224344 | C   | T   | 15.15% | OR2L3     | nonsynonymous SNV                | Validated             |
| 8   | chr10 | 96535189  | G   | C   | 27.72% | CYP2C19   | nonsynonymous SNV                | Heterozygous          |
| 9   | chr11 | 1258327   | G   | A   | 25.41% | MUC5B     | nonsynonymous SNV                | Not present           |
| 10  | chr11 | 1718844   | T   | C   | 14.86% | KRTAP5-6  | synonymous SNV                   | Validated             |
| 11  | chr11 | 56344581  | G   | T   | 13.04% | OR5M10    | nonsynonymous SNV                | Validated             |
| 12  | chr11 | 104905100 | T   | G   | 16.90% | CASP1     | nonsynonymous SNV                | Validated             |
| 13  | chr12 | 6138596   | C   | T   | 19.54% | VWF       | nonsynonymous SNV                | Validated             |
| 14  | chr12 | 9243951   | A   | G   | 14.71% | A2M       | nonsynonymous SNV                | Not present           |
| 15  | chr12 | 42512876  | T   | G   | 16.13% | GXYLT1    | nonsynonymous SNV                | Technical failure     |
| 16  | chr12 | 104376635 | C   | T   | 18.52% | TDG       | synonymous SNV                   | Not present           |
| 17  | chr13 | 21742240  | C   | A   | 22.95% | SKA3      | nonsynonymous SNV                | Heterozygous          |
| 18  | chr14 | 23844983  | G   | A   | 27.34% | IL25      | nonsynonymous SNV                | Heterozygous          |
| 19  | chr16 | 4833750   | A   | G   | 22.77% | SETP12    | nonsynonymous SNV                | Validated             |
| 20  | chr16 | 88712548  | G   | A   | 23.53% | CYBA      | synonymous SNV                   | Validated             |
| 21  | chr17 | 13400048  | G   | C   | 27.40% | HS3ST3A1  | nonsynonymous SNV                | Heterozygous          |

|    |       |           |   |   |        |          |                   |                   |
|----|-------|-----------|---|---|--------|----------|-------------------|-------------------|
| 22 | chr17 | 39502849  | T | G | 22.06% | KRT33A   | nonsynonymous SNV | Validated         |
| 23 | chr17 | 39521517  | C | T | 29.93% | KRT33B   | synonymous SNV    | Heterozygous      |
| 24 | chr17 | 45234387  | A | G | 16.85% | CDC27    | nonsynonymous SNV | Not present       |
| 25 | chr17 | 48070896  | C | A | 30.25% | DLX3     | nonsynonymous SNV | Technical failure |
| 26 | chr17 | 76499013  | G | A | 28.24% | DNAH17   | synonymous SNV    | Validated         |
| 27 | chr19 | 8999476   | G | C | 20.21% | MUC16    | nonsynonymous SNV | Heterozygous      |
| 28 | chr19 | 9006365   | C | A | 17.24% | MUC16    | nonsynonymous SNV | Not present       |
| 29 | chr19 | 9361855   | G | A | 30.15% | OR7E24   | nonsynonymous SNV | Validated         |
| 30 | chr19 | 14877162  | T | C | 20.00% | EMR2     | synonymous SNV    | Technical failure |
| 31 | chr19 | 36275201  | G | A | 26.04% | ARHGAP33 | nonsynonymous SNV | Validated         |
| 32 | chr19 | 50170347  | G | A | 22.34% | BCL2L12  | nonsynonymous SNV | Technical failure |
| 33 | chr2  | 26702178  | C | T | 28.11% | OTOF     | nonsynonymous SNV | Heterozygous      |
| 34 | chr2  | 85991195  | C | T | 28.30% | ATOH8    | nonsynonymous SNV | Validated         |
| 35 | chr20 | 60718900  | C | T | 19.70% | SS18L1   | synonymous SNV    | Technical failure |
| 36 | chr20 | 60888258  | G | A | 22.95% | LAMA5    | synonymous SNV    | Validated         |
| 37 | chr21 | 44836731  | C | T | 27.42% | SIK1     | nonsynonymous SNV | Technical failure |
| 38 | chr22 | 50752254  | G | A | 20.16% | DENND6B  | nonsynonymous SNV | Validated         |
| 39 | chr3  | 45837911  | T | C | 20.31% | SLC6A20  | start lost        | Validated         |
| 40 | chr3  | 122629742 | T | C | 19.28% | SEMA5B   | nonsynonymous SNV | Validated         |
| 41 | chr5  | 115177753 | A | G | 18.18% | AP3S1    | nonsynonymous SNV | Technical failure |
| 42 | chr5  | 140242885 | C | G | 27.56% | AX746964 | nonsynonymous SNV | Heterozygous      |
| 43 | chr6  | 5004177   | G | A | 22.92% | RPP40    | synonymous SNV    | Validated         |
| 44 | chr6  | 26458871  | T | C | 22.45% | BTN2A1   | nonsynonymous SNV | Technical failure |
| 45 | chr6  | 54066945  | A | C | 18.18% | MLIP     | nonsynonymous SNV | Heterozygous      |

|    |      |           |   |   |        |        |                   |                   |
|----|------|-----------|---|---|--------|--------|-------------------|-------------------|
| 46 | chr6 | 56497767  | A | C | 14.81% | DST    | nonsynonymous SNV | Technical failure |
| 47 | chr6 | 136594277 | G | A | 20.83% | BCLAF1 | nonsynonymous SNV | Technical failure |
| 48 | chr7 | 1535876   | C | T | 14.74% | INTS1  | nonsynonymous SNV | Validated         |
| 49 | chr7 | 2617927   | C | A | 15.35% | IQCE   | nonsynonymous SNV | Technical failure |
| 50 | chr7 | 150815676 | C | T | 22.32% | AGAP3  | nonsynonymous SNV | Validated         |
| 51 | chr7 | 157178323 | C | T | 26.15% | DNAJB6 | nonsynonymous SNV | Technical failure |
| 52 | chr8 | 144921555 | T | C | 30.41% | NRBP2  | nonsynonymous SNV | Validated         |
| 53 | chr8 | 144940260 | C | T | 12.14% | EPPK1  | nonsynonymous SNV | Technical failure |
| 54 | chr9 | 95481489  | C | T | 26.92% | BICD2  | nonsynonymous SNV | Heterozygous      |
| 55 | chrX | 135960166 | G | A | 25.25% | RBMX   | nonsynonymous SNV | Heterozygous      |
| 56 | chrX | 153416209 | C | T | 21.17% | OPN1LW | nonsynonymous SNV | Technical failure |

The 56 putative somatic variants detected in this study. Chromosome, base position (with reference to hg19 build), reference and observed alternate allele, ratio of alternate to reference allele, gene name, and whether the variant is synonymous or non-synonymous are shown. Finally, the results of the validation experiment are shown. Abbreviations: Chr, Chromosome; Pos, Position; Ref, Reference allele; Alt, Alternative allele; VAF, Variant Allele Frequency.

**Supplementary Table 3. Expected and observed variants occurring within different cohorts of genes as grouped by established brain expression data.**

| <b>Brain proteome data</b>                 |                                           |                                   |                                  |
|--------------------------------------------|-------------------------------------------|-----------------------------------|----------------------------------|
| <b>Brain proteome gene set</b>             | <b>Observed variant (total validated)</b> | <b>Expected variant frequency</b> | <b>binomial test (p-value) *</b> |
| <b>Elevated in Brain (n=1224)</b>          | 1                                         | 1.1                               | 1.0                              |
| <b>Expressed in all (n=8588)</b>           | 5                                         | 7.8                               | 0.48                             |
| <b>Mixed expression pattern (n=4404)</b>   | 4                                         | 4                                 | 1.0                              |
| <b>Not detected in brain (n=1318)</b>      | 2                                         | 1.2                               | 0.36                             |
| <b>Not detected in any tissue (n=4157)</b> | 5                                         | 3.8                               | 0.56                             |

\*Binomial testing was performed between observed and expected variant proportions.

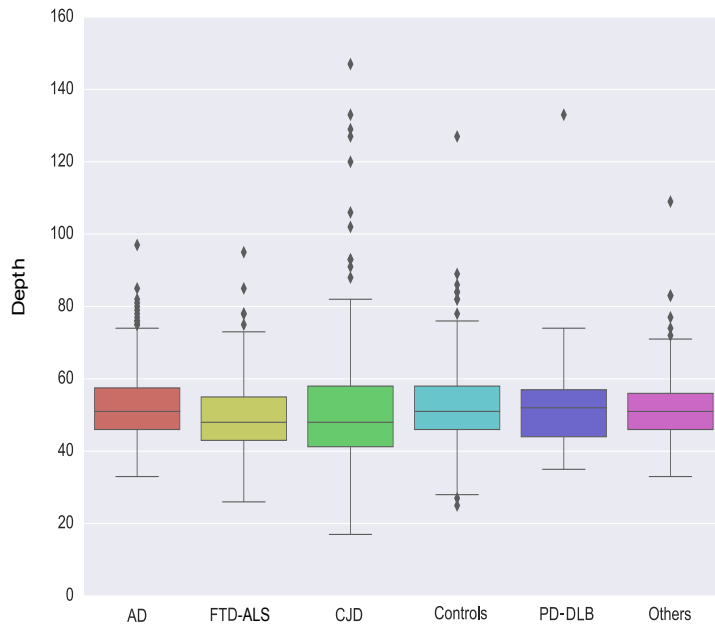

**Supplementary Figure 1.** Average sequencing depth for each group within the study. There were no significant differences (one-way ANOVA). Abbreviations: AD, Alzheimer’s disease; CJD, Creutzfeldt Jakob Disease; FTD-ALS, Frontotemporal dementia – Amyotrophic lateral sclerosis; PD-DLB, Parkinson’s disease – Dementia with Lewy Bodies.

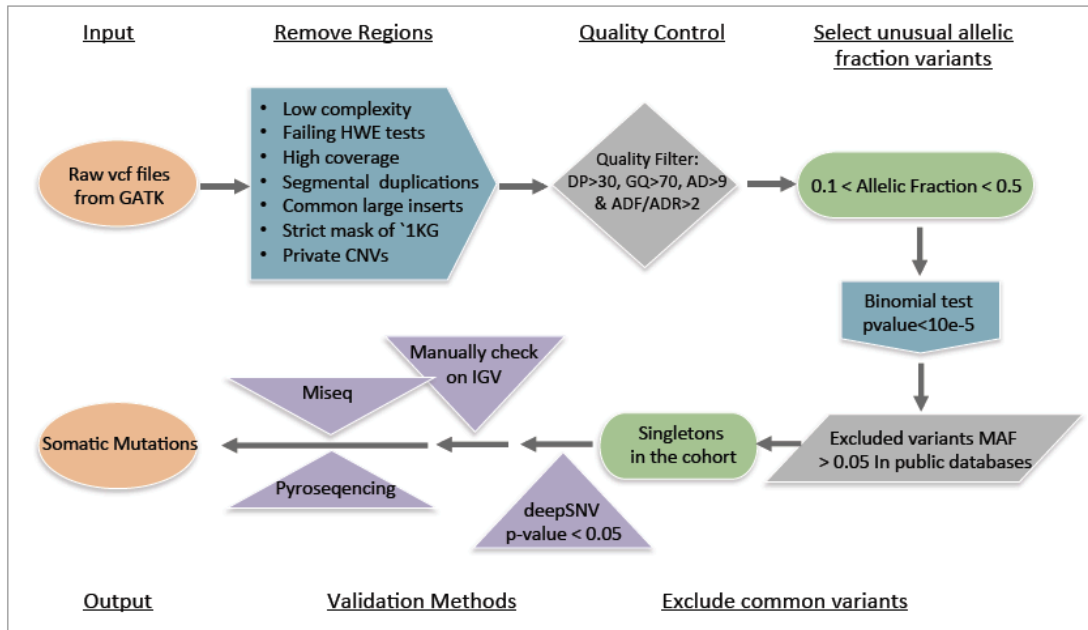

**Supplementary Figure 2. An overview of the pipeline to detect somatic variants within the dataset.** Abbreviations: VCF, Variant Call Format; GATK, Genome Analysis Tool Kit; HEW, Hardy-Weinberg; CNV, Copy Number Variant; DP, Depth; GQ, Genotype Quality; AD, Allele Depth; ADF/ADR, Depth of bases supporting variant on forward/reverse strand; MAF, Minor Allele Frequency.

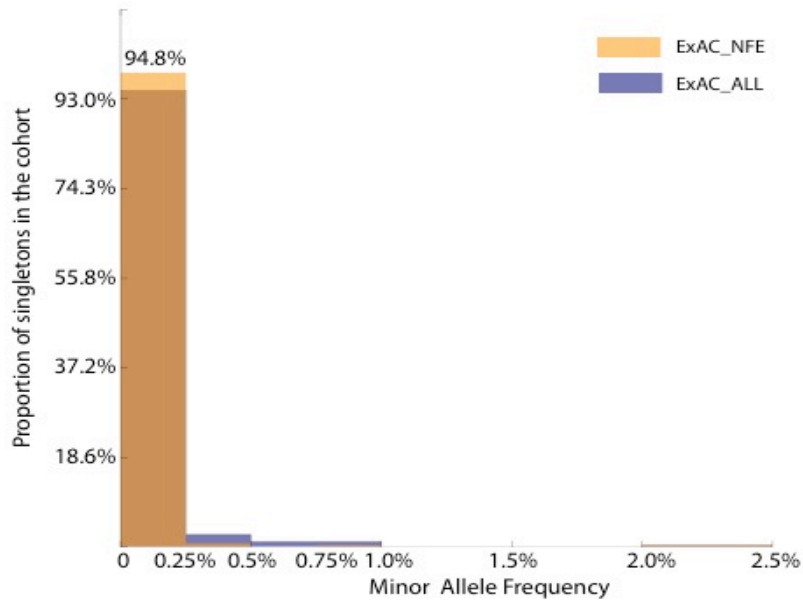

**Supplementary Figure 3.** Proportion of putative somatic variants (before further filtering) against their minor allele frequency (MAF) in the population within the ExAC database. The frequency for both non-Finnish Europeans (NFE) and all individuals (ALL) are shown.



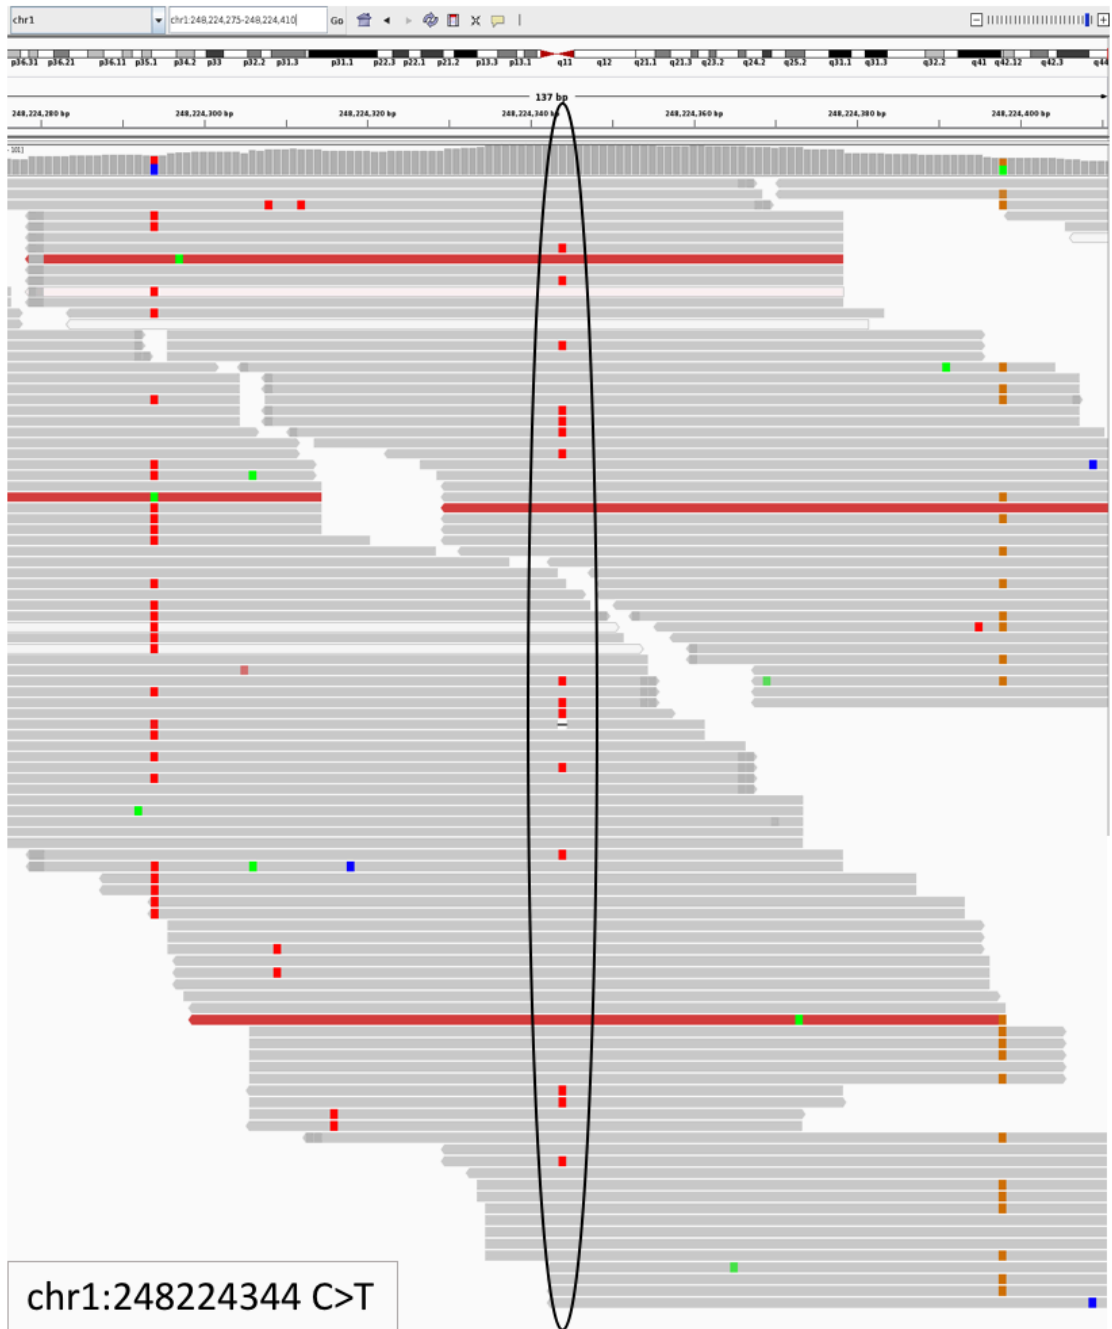

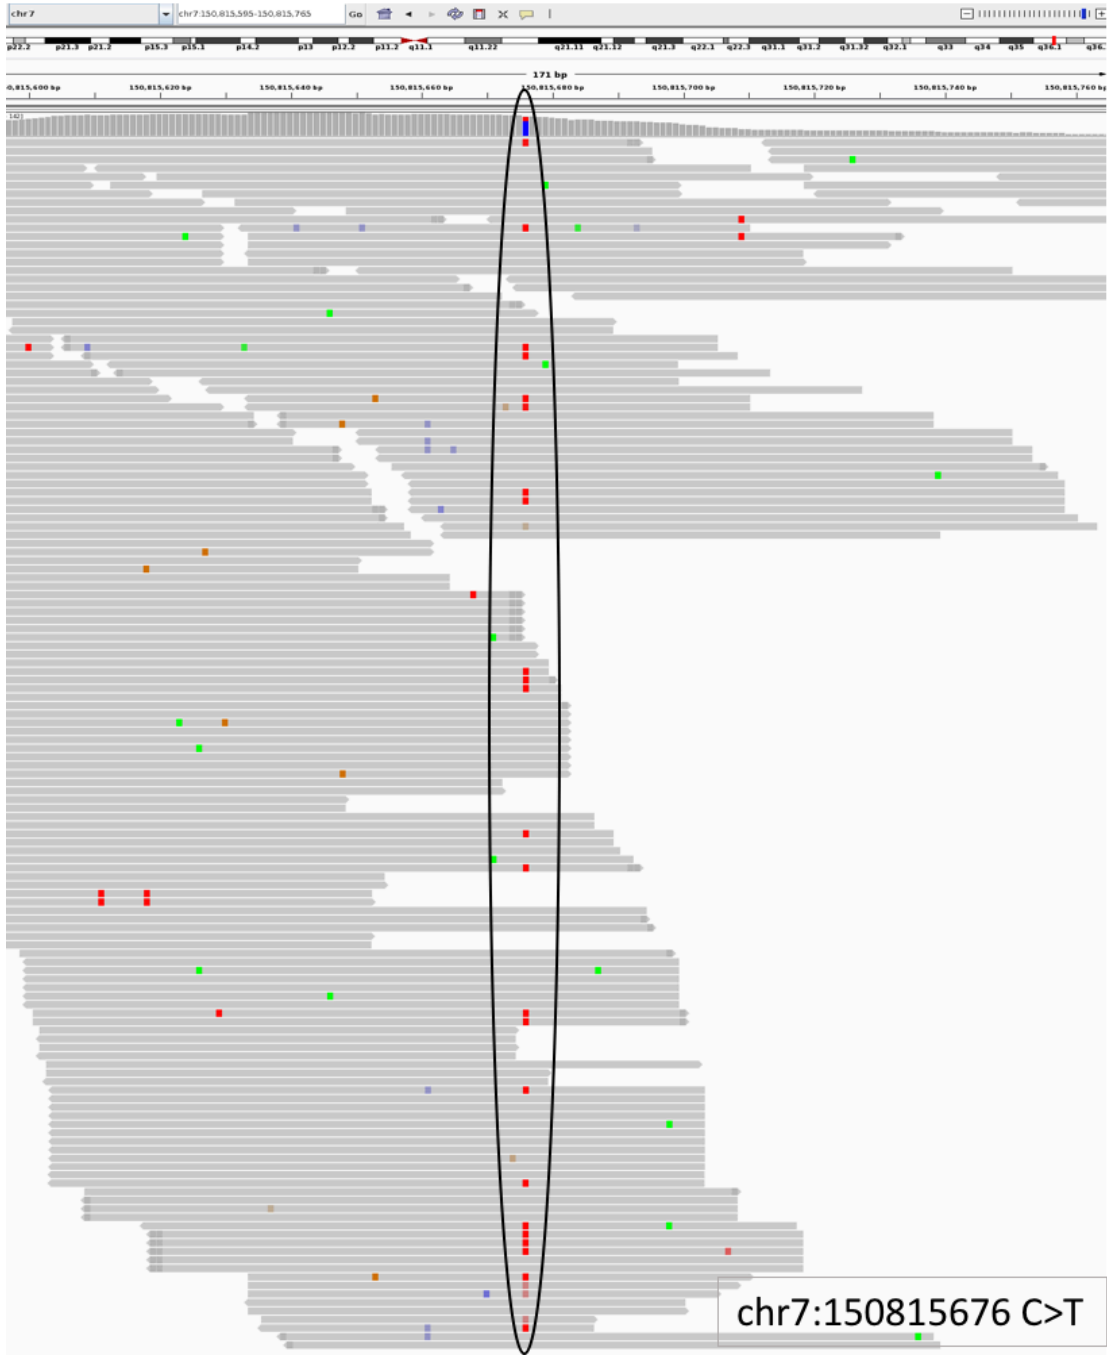

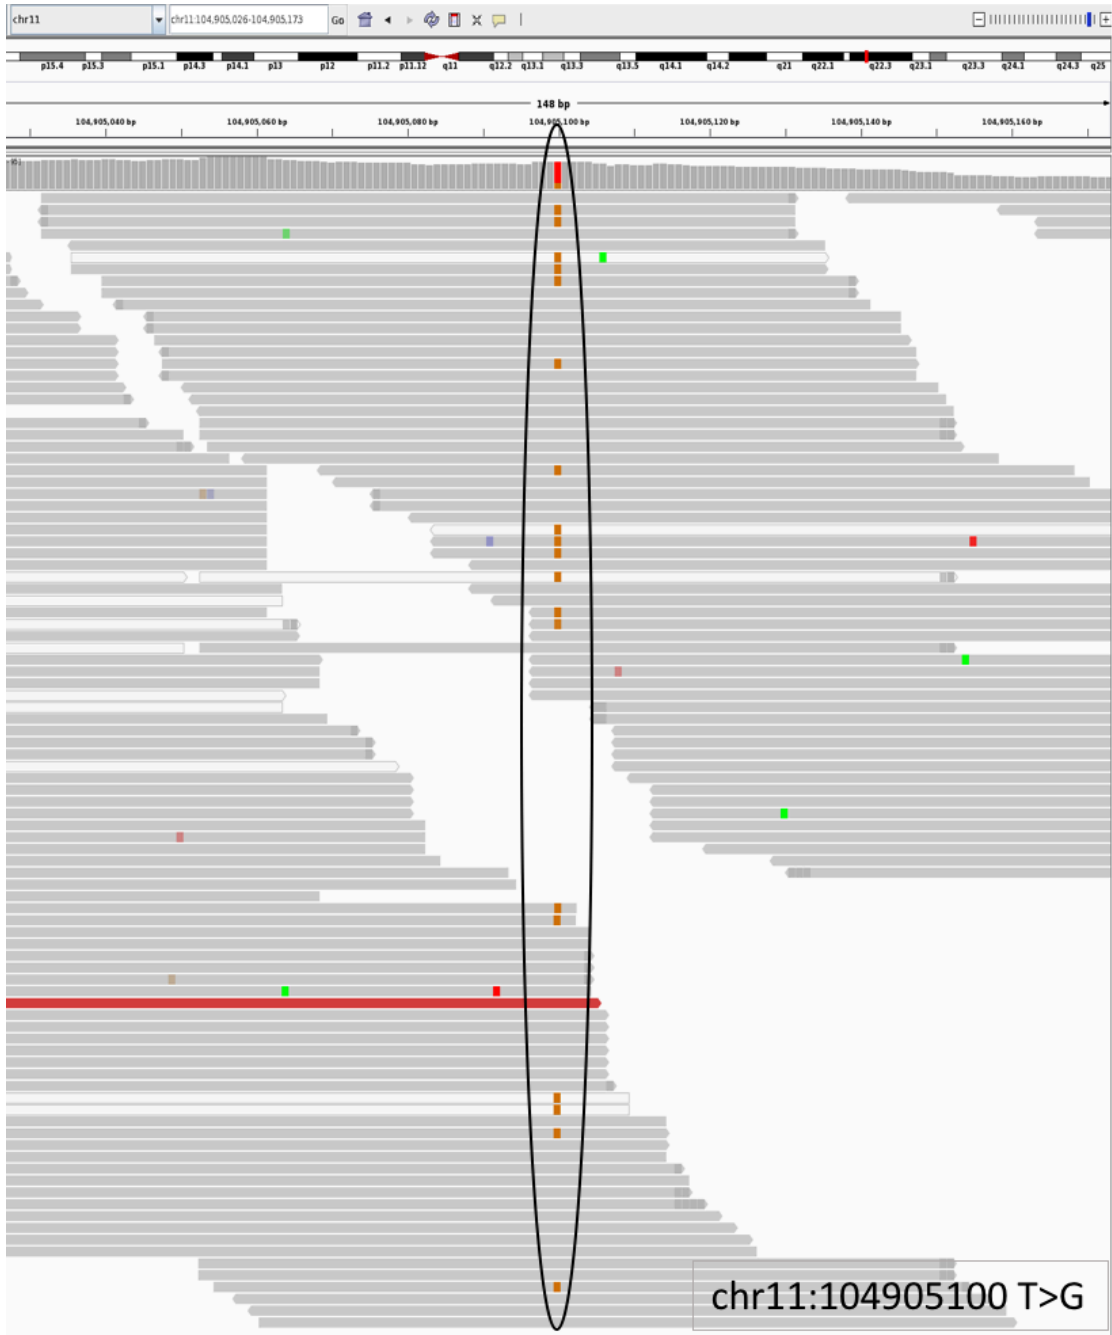

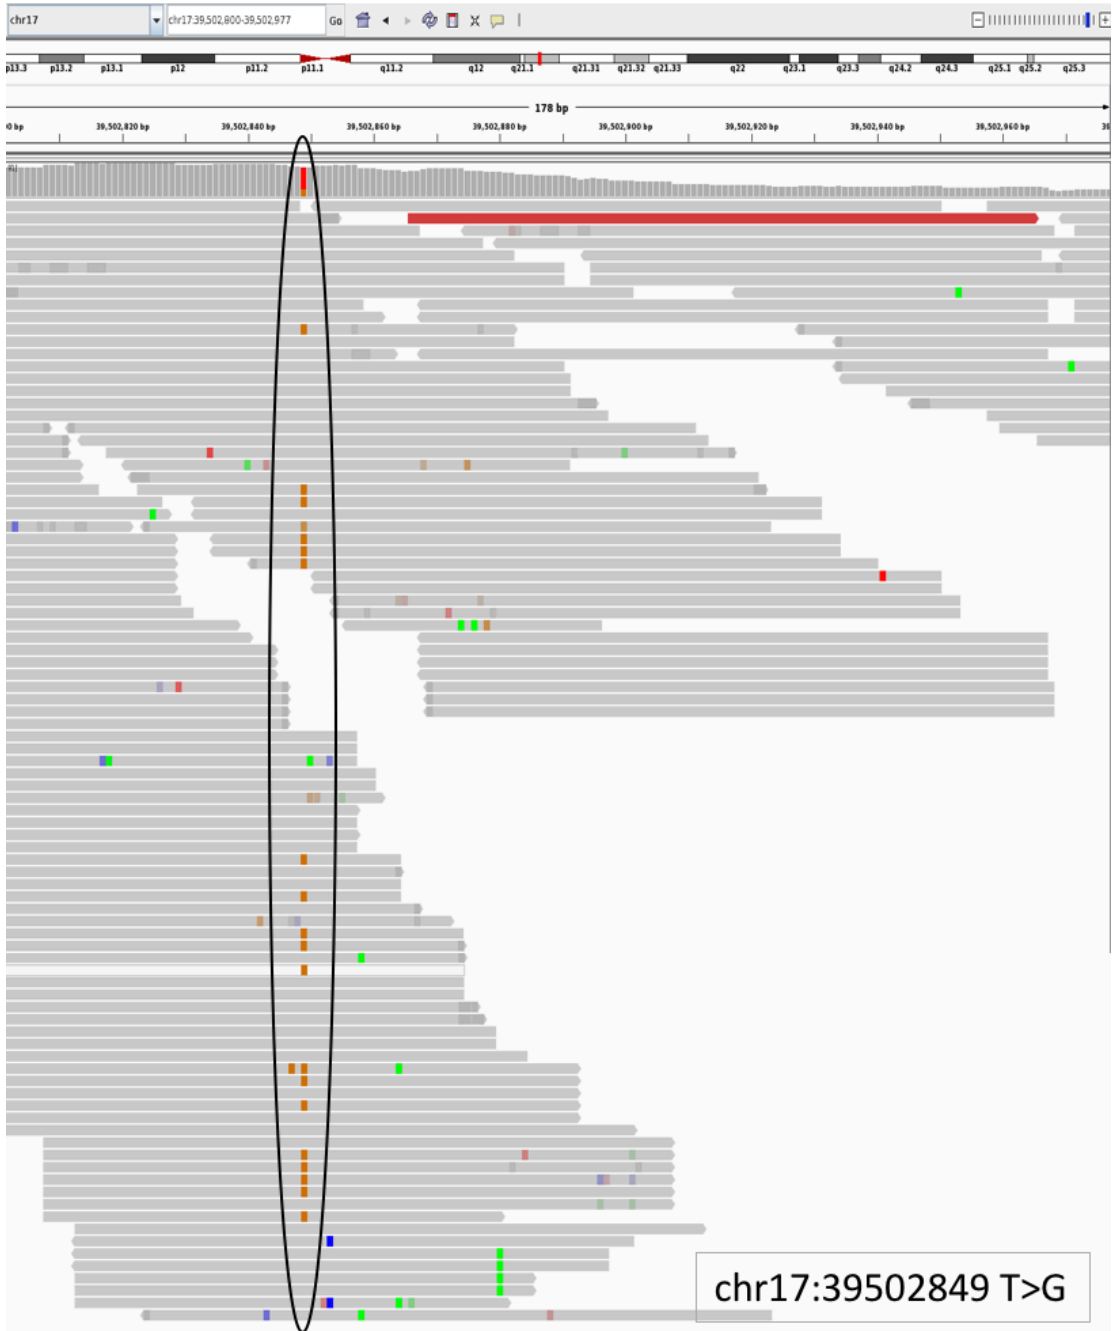

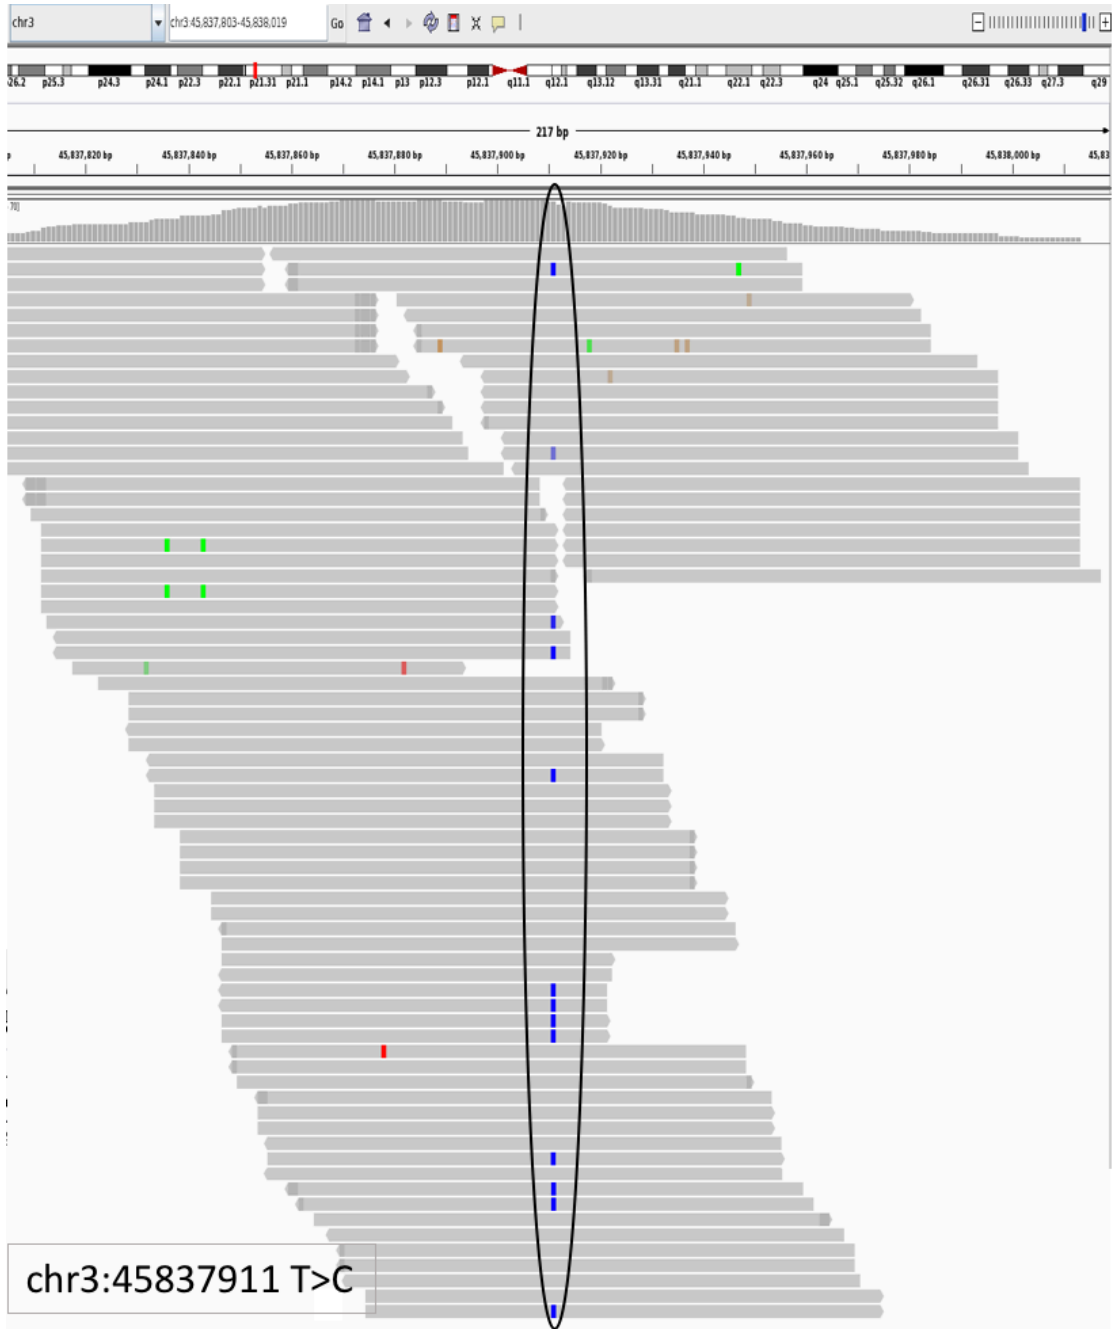

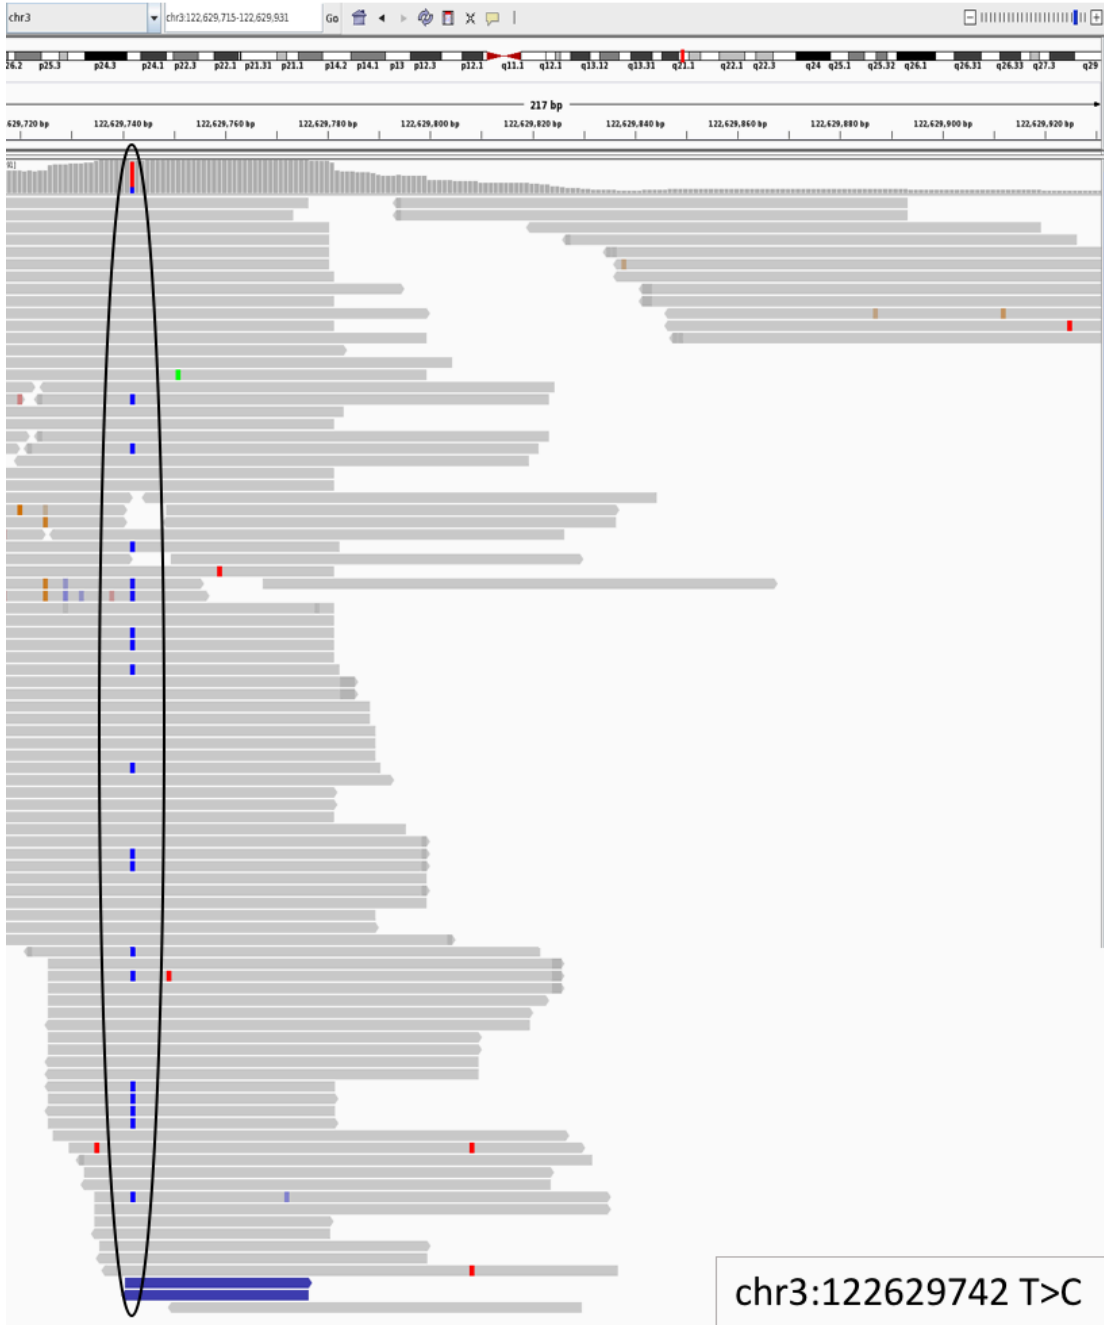

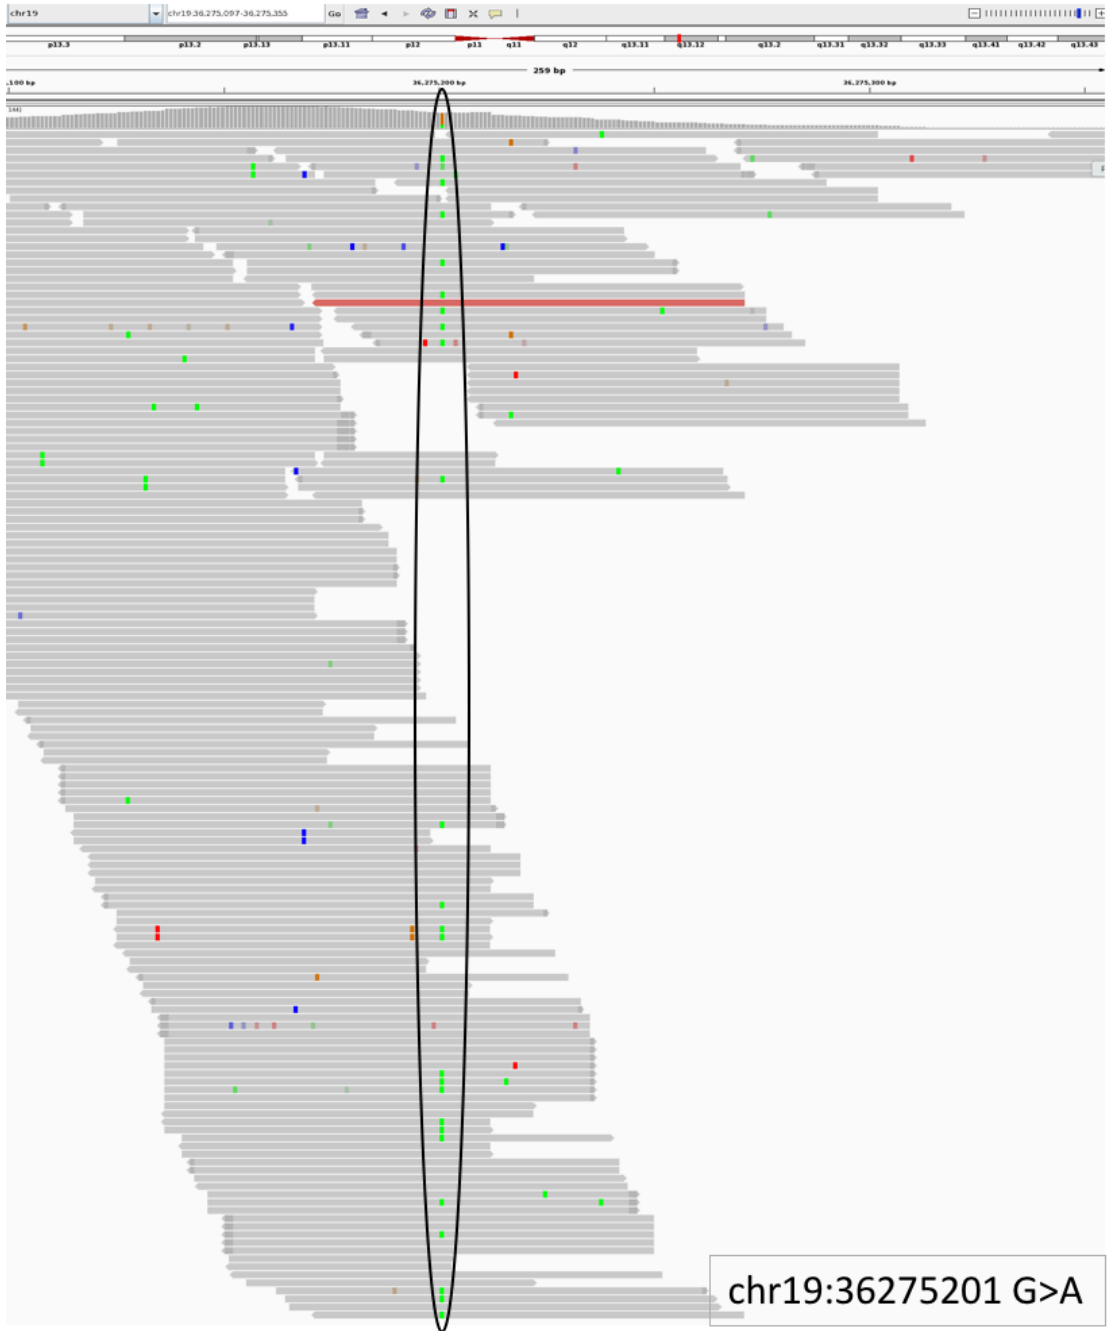

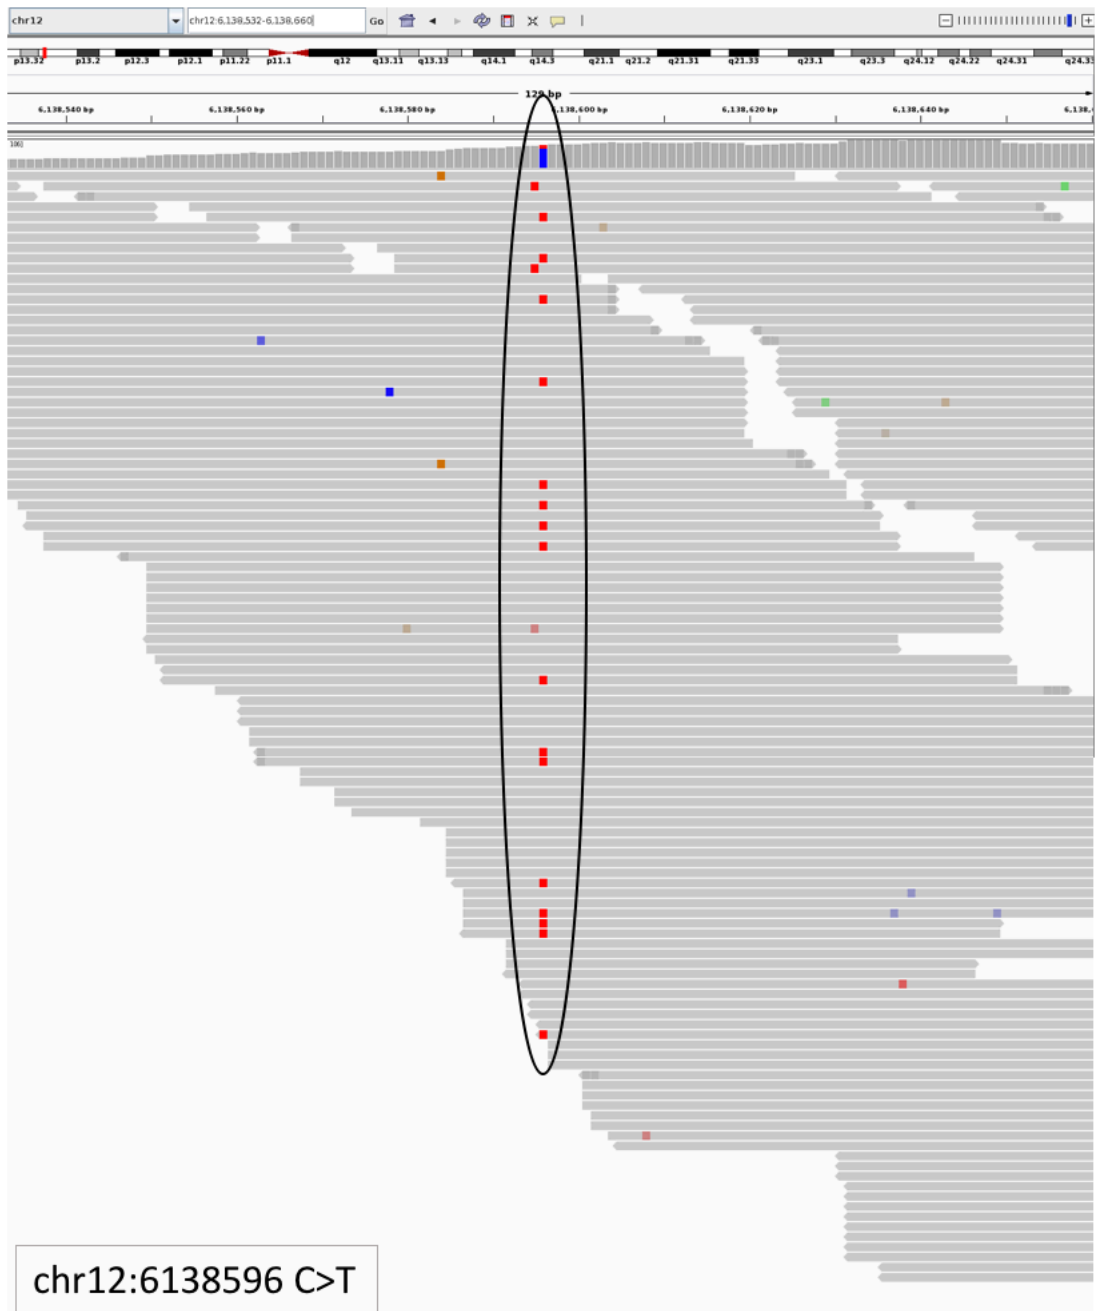



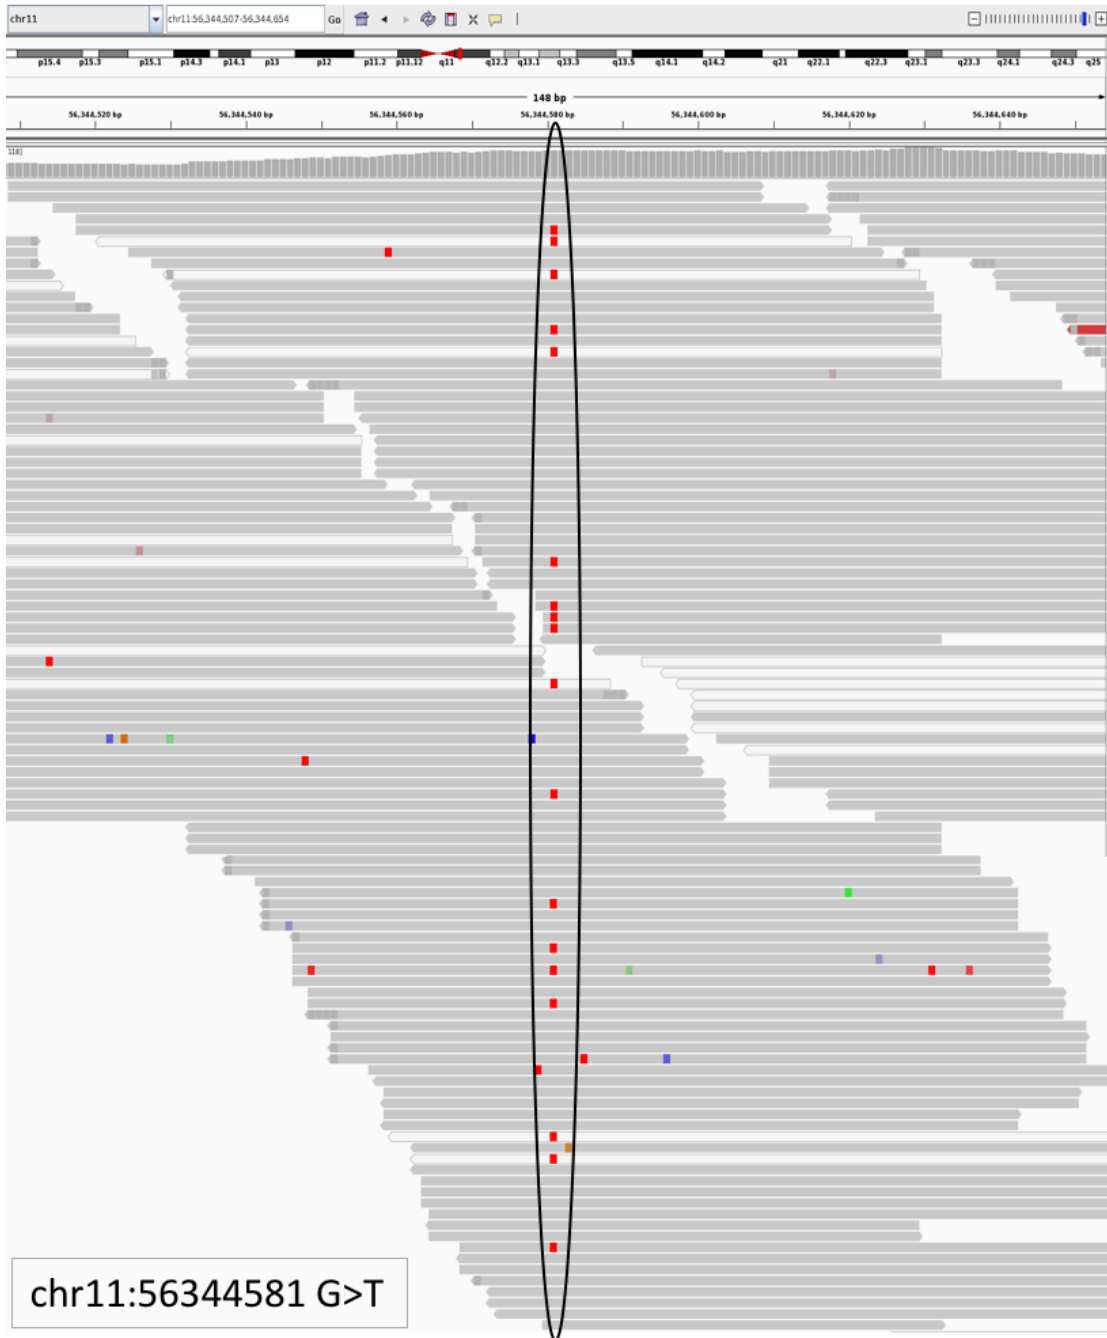

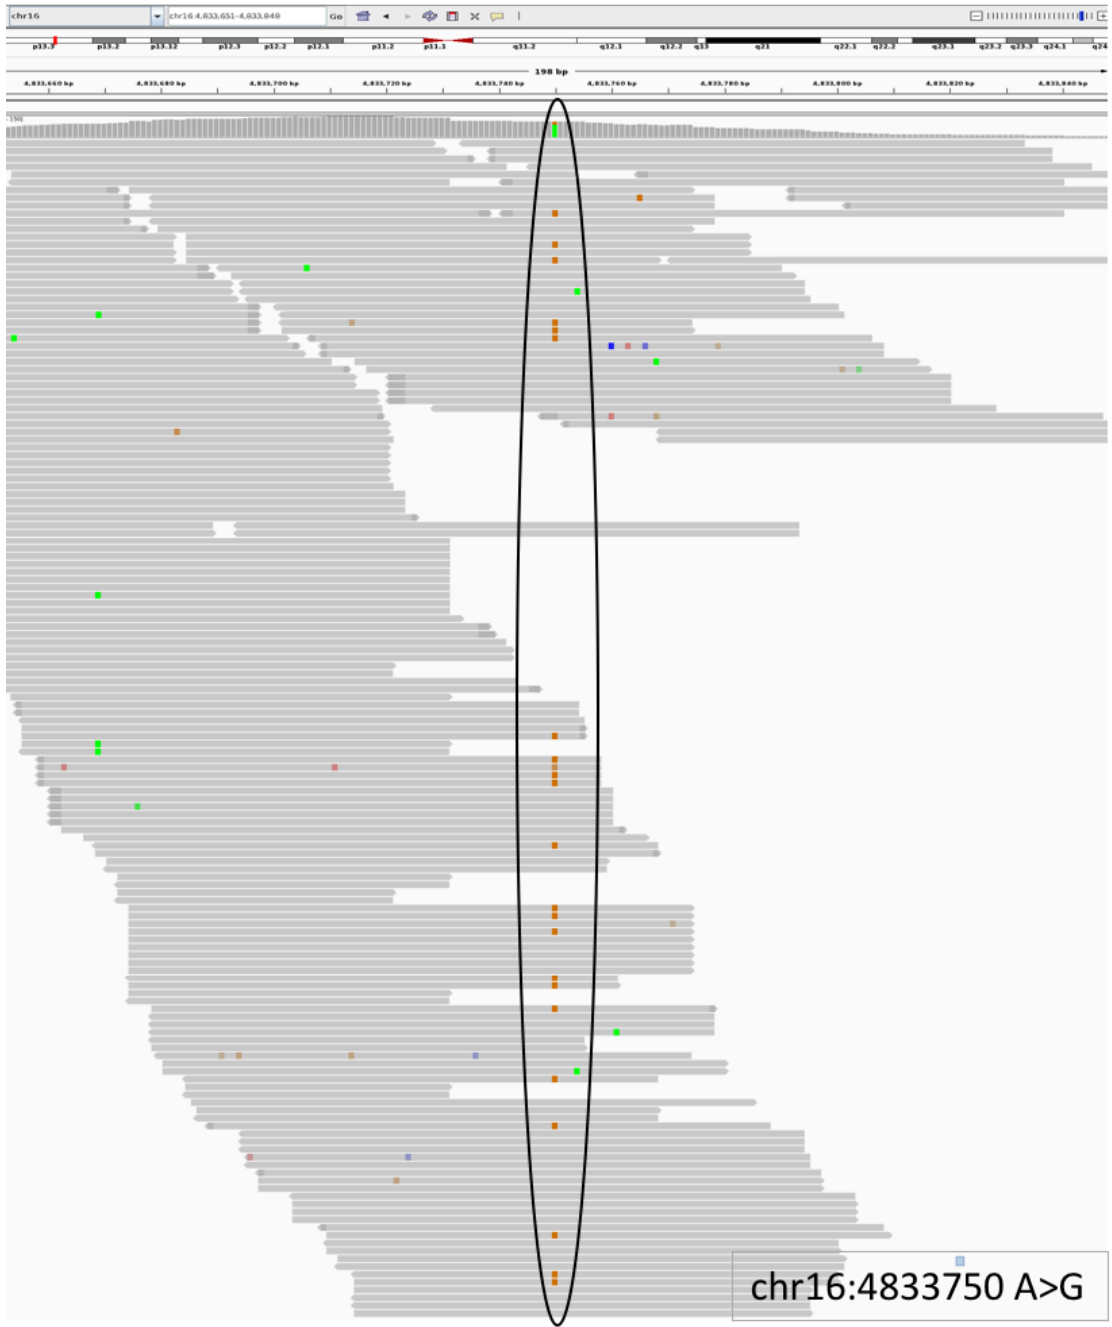

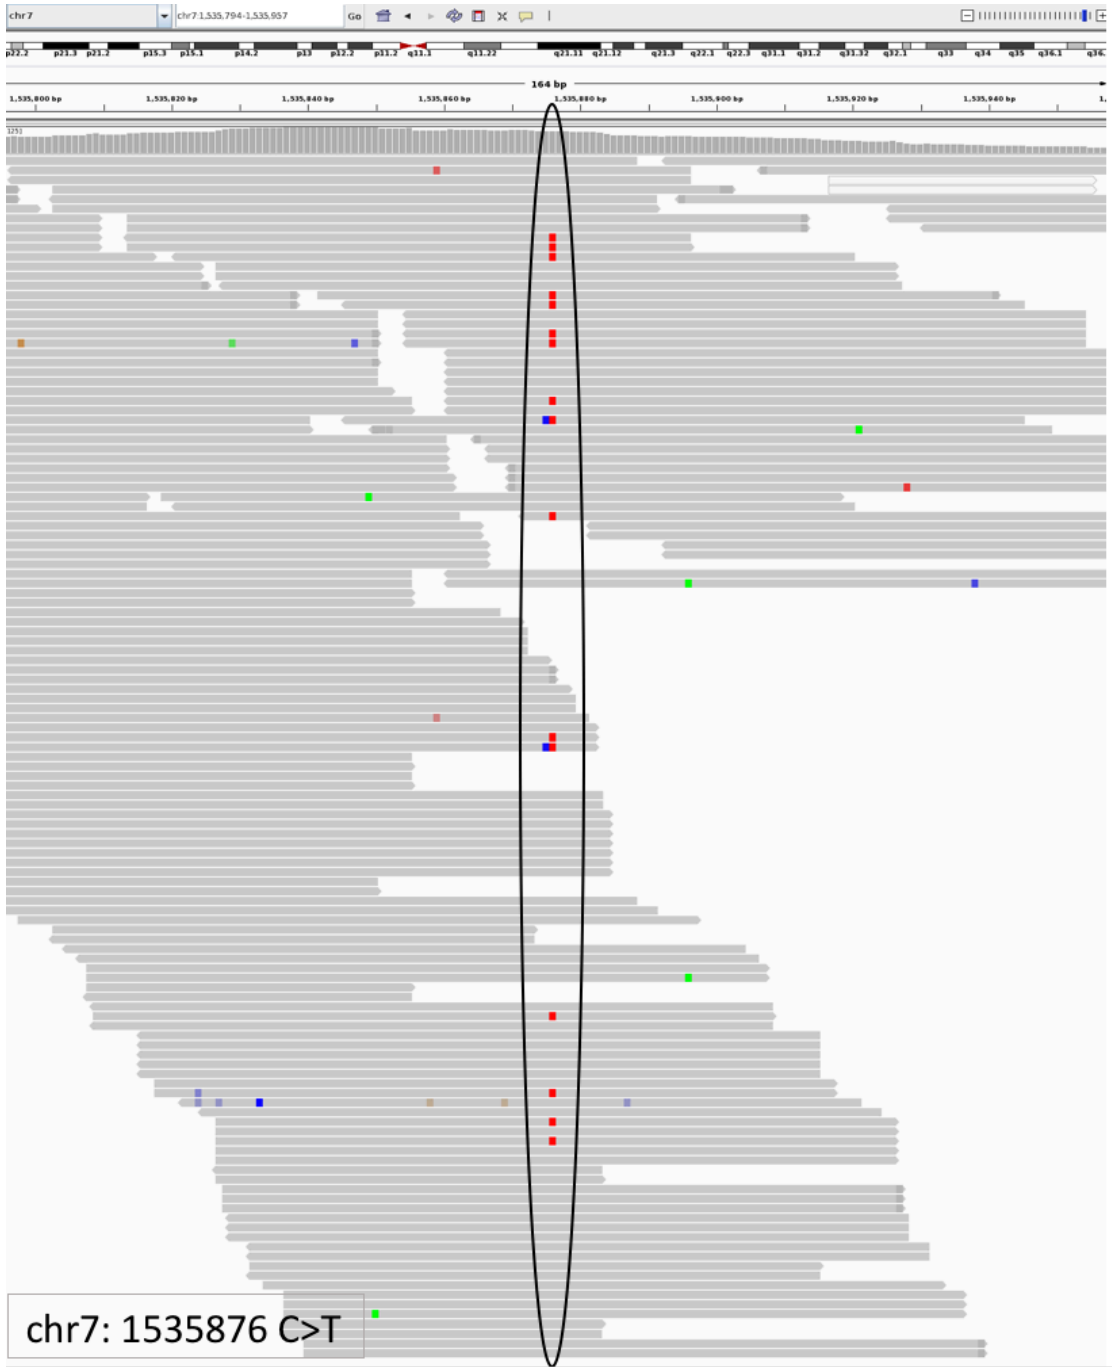

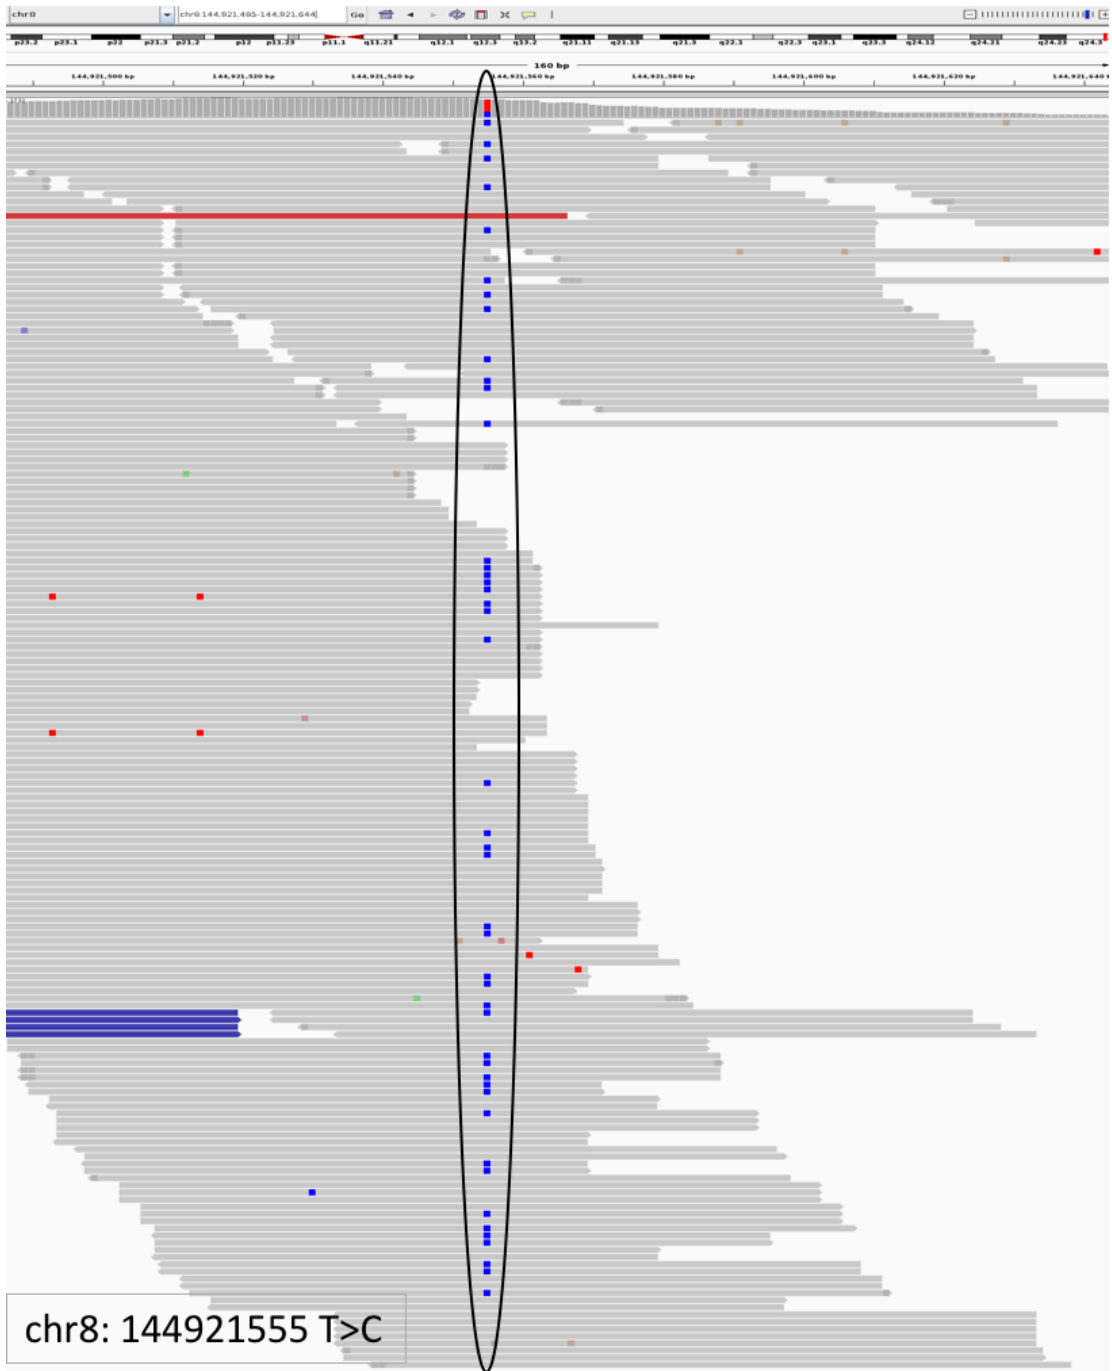

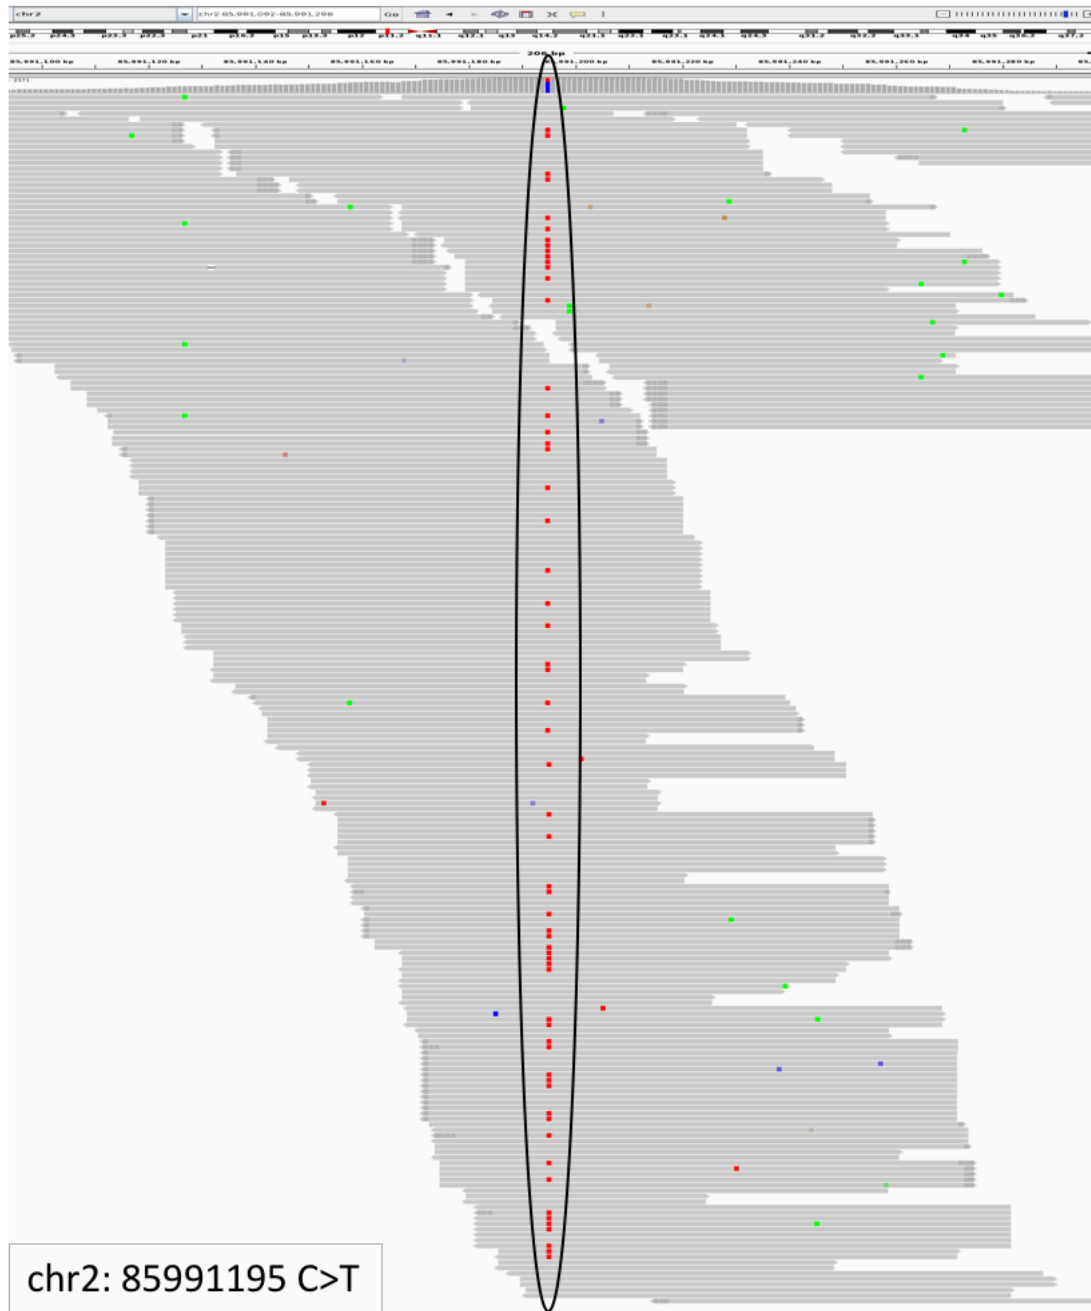

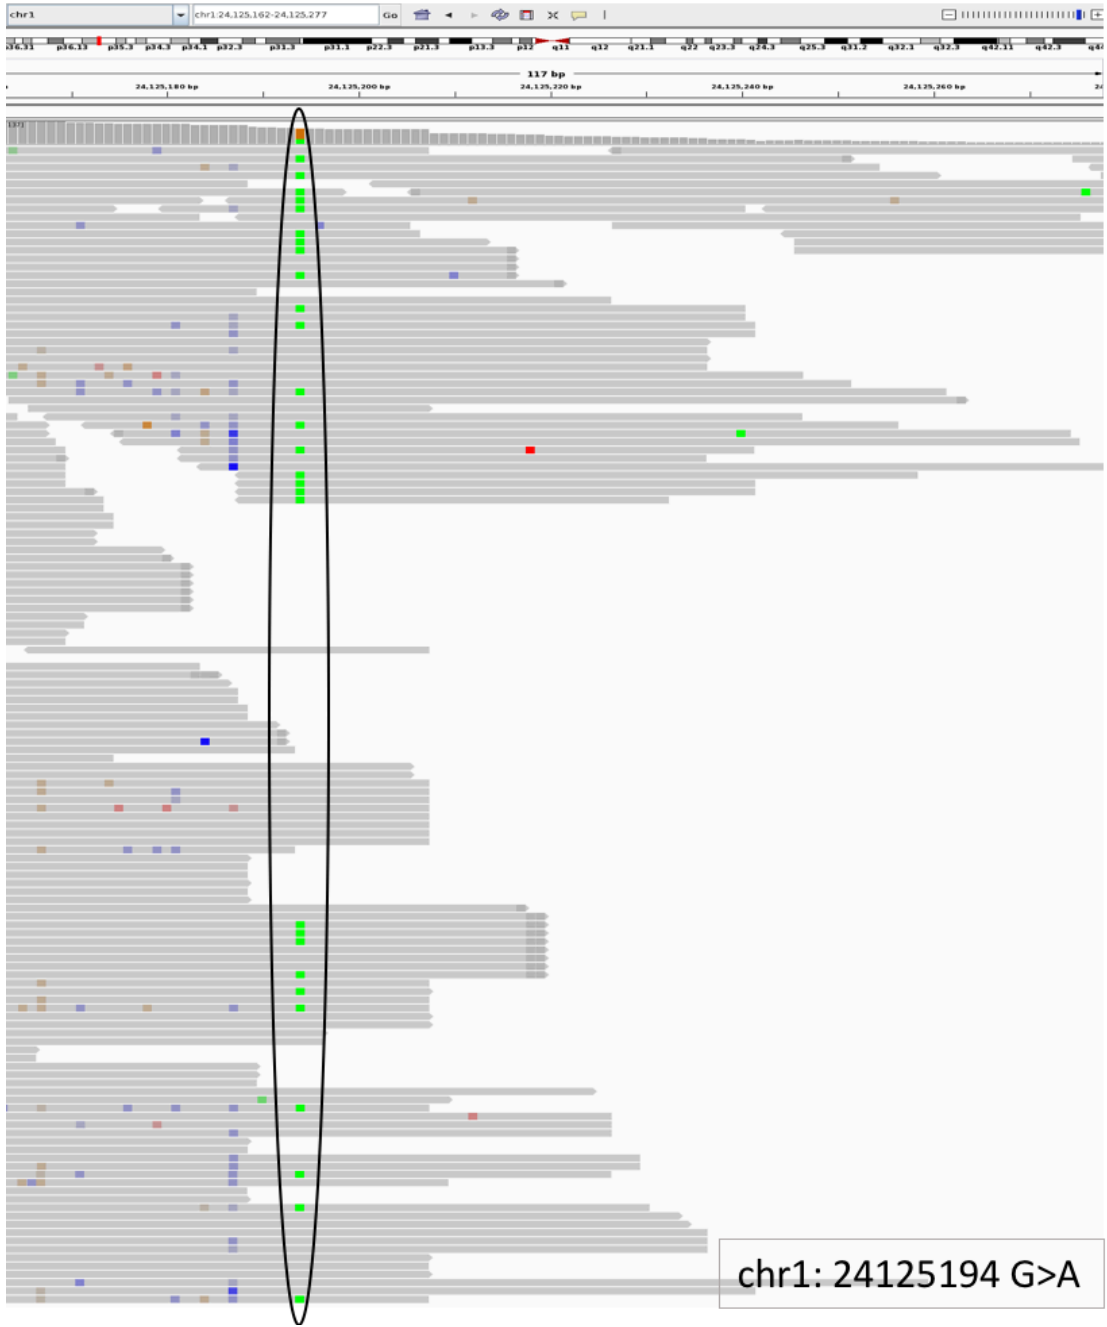

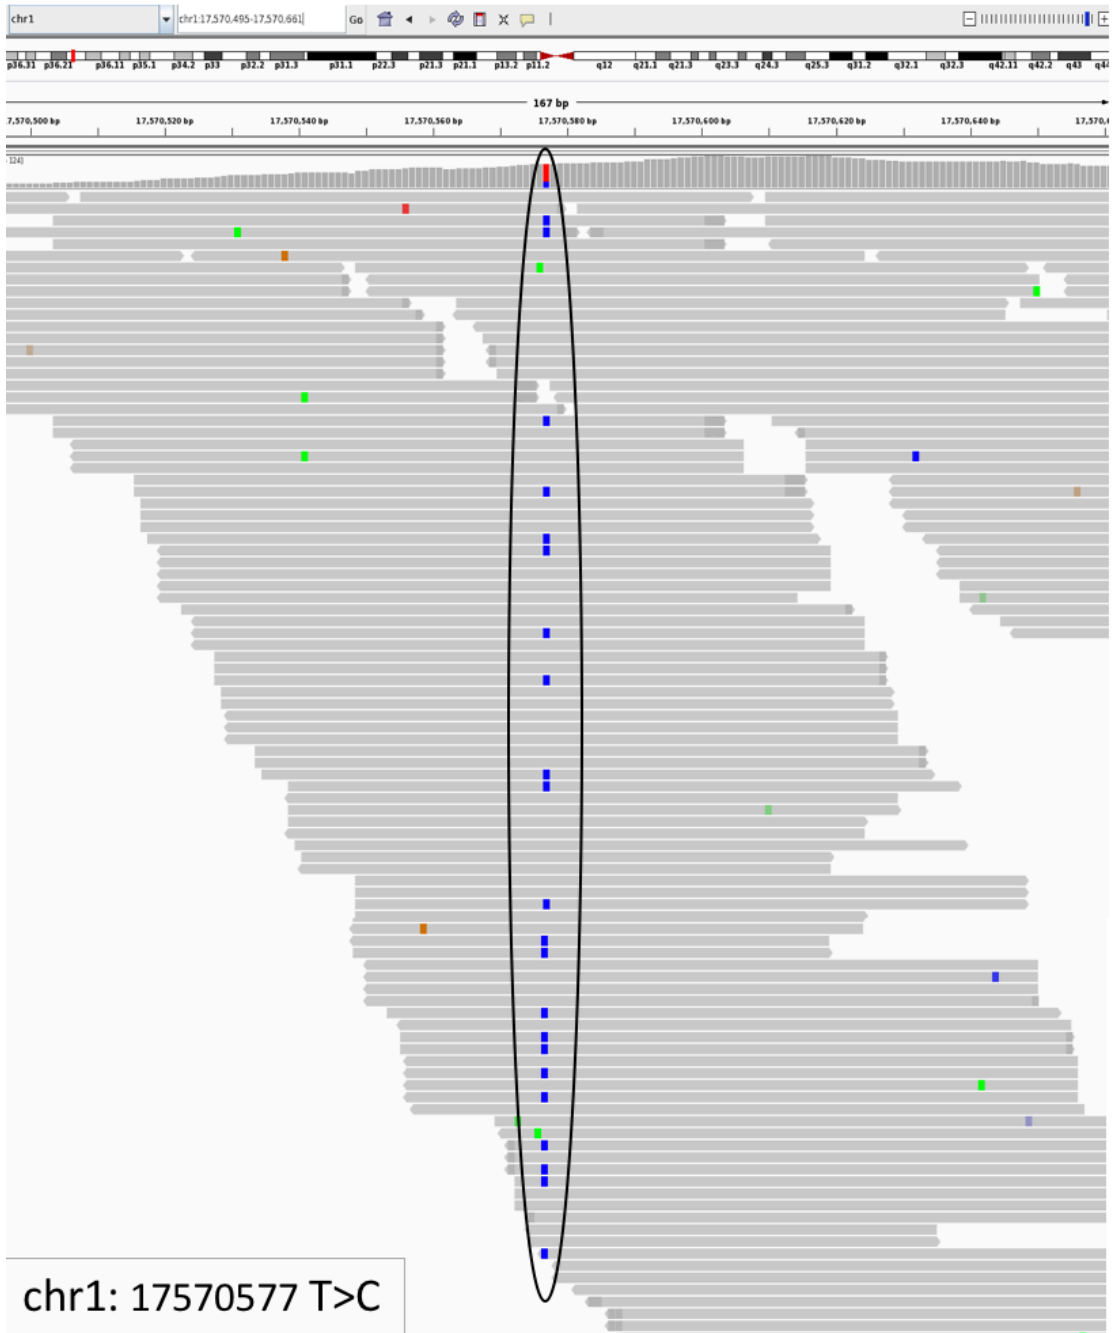

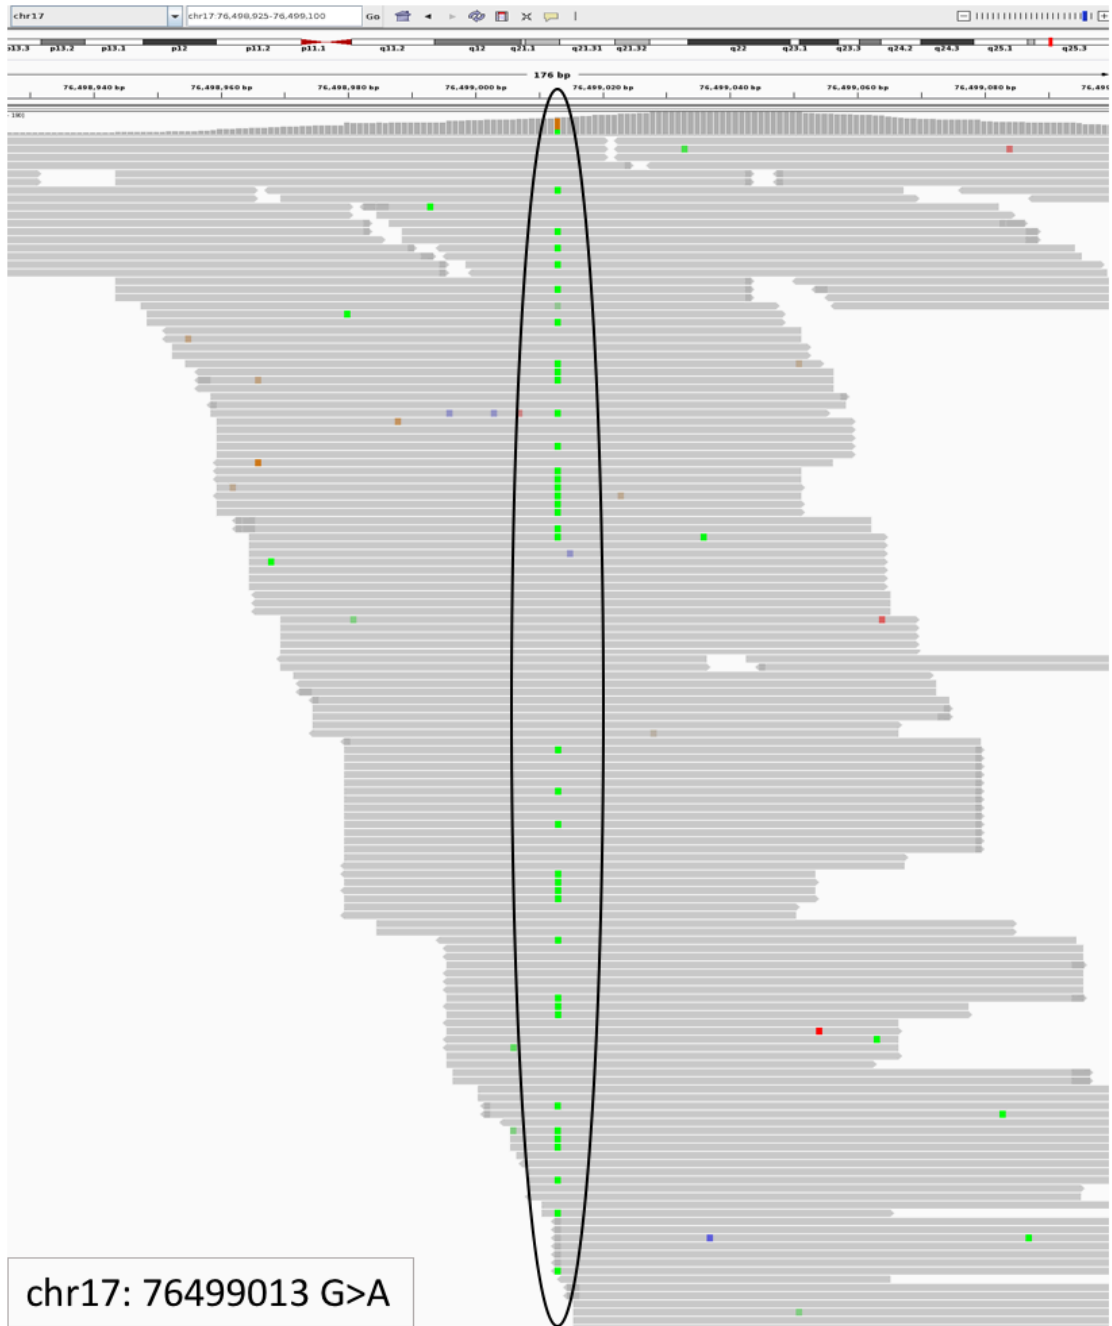



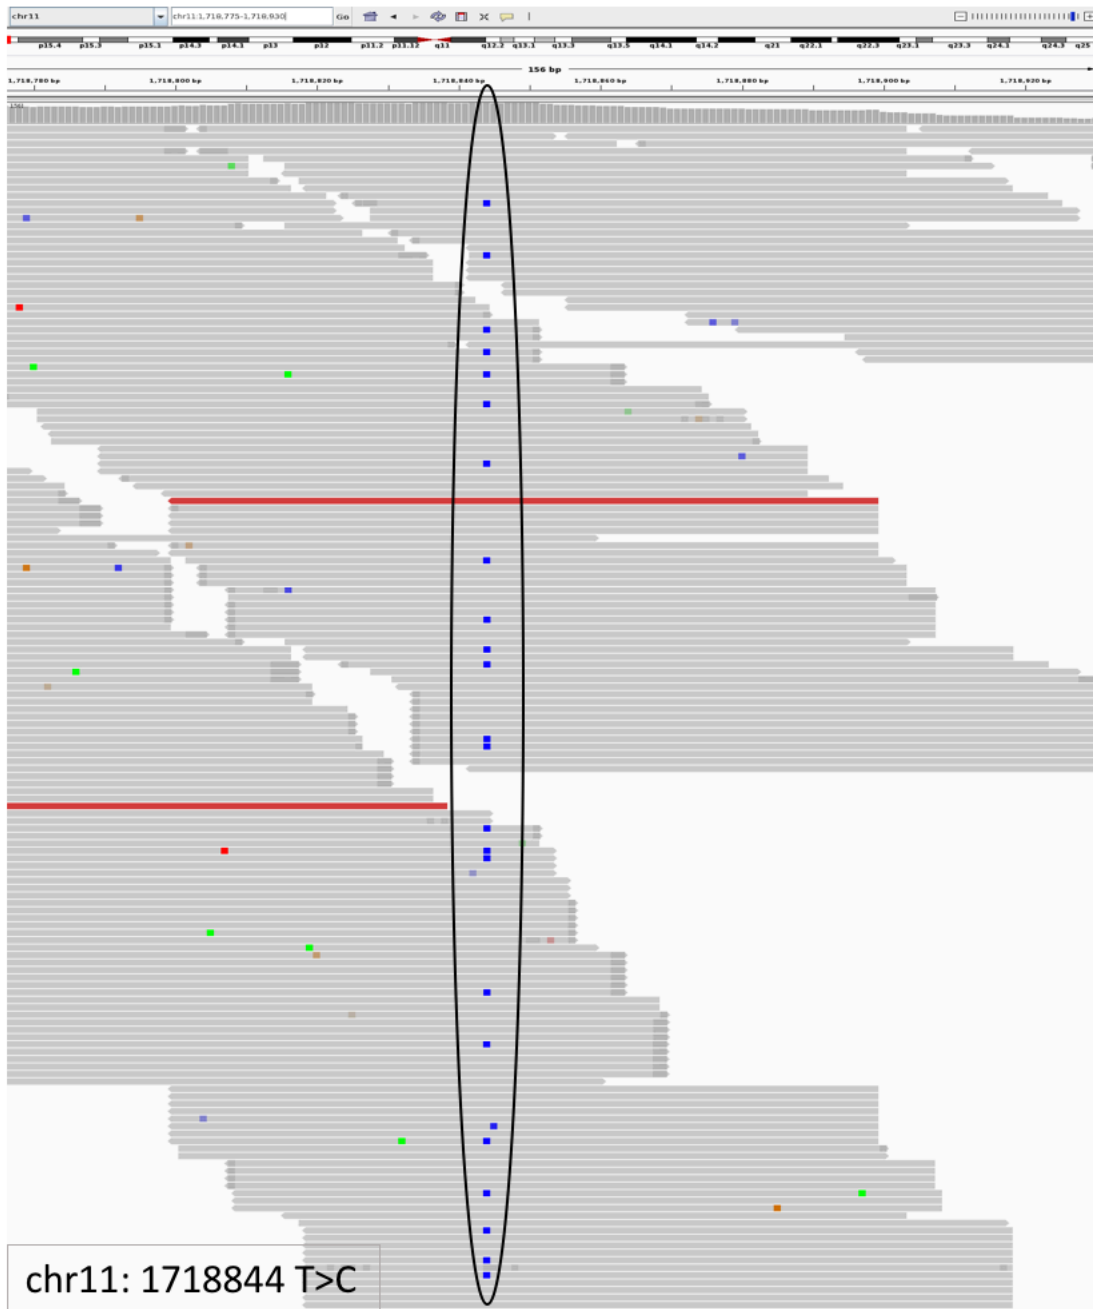

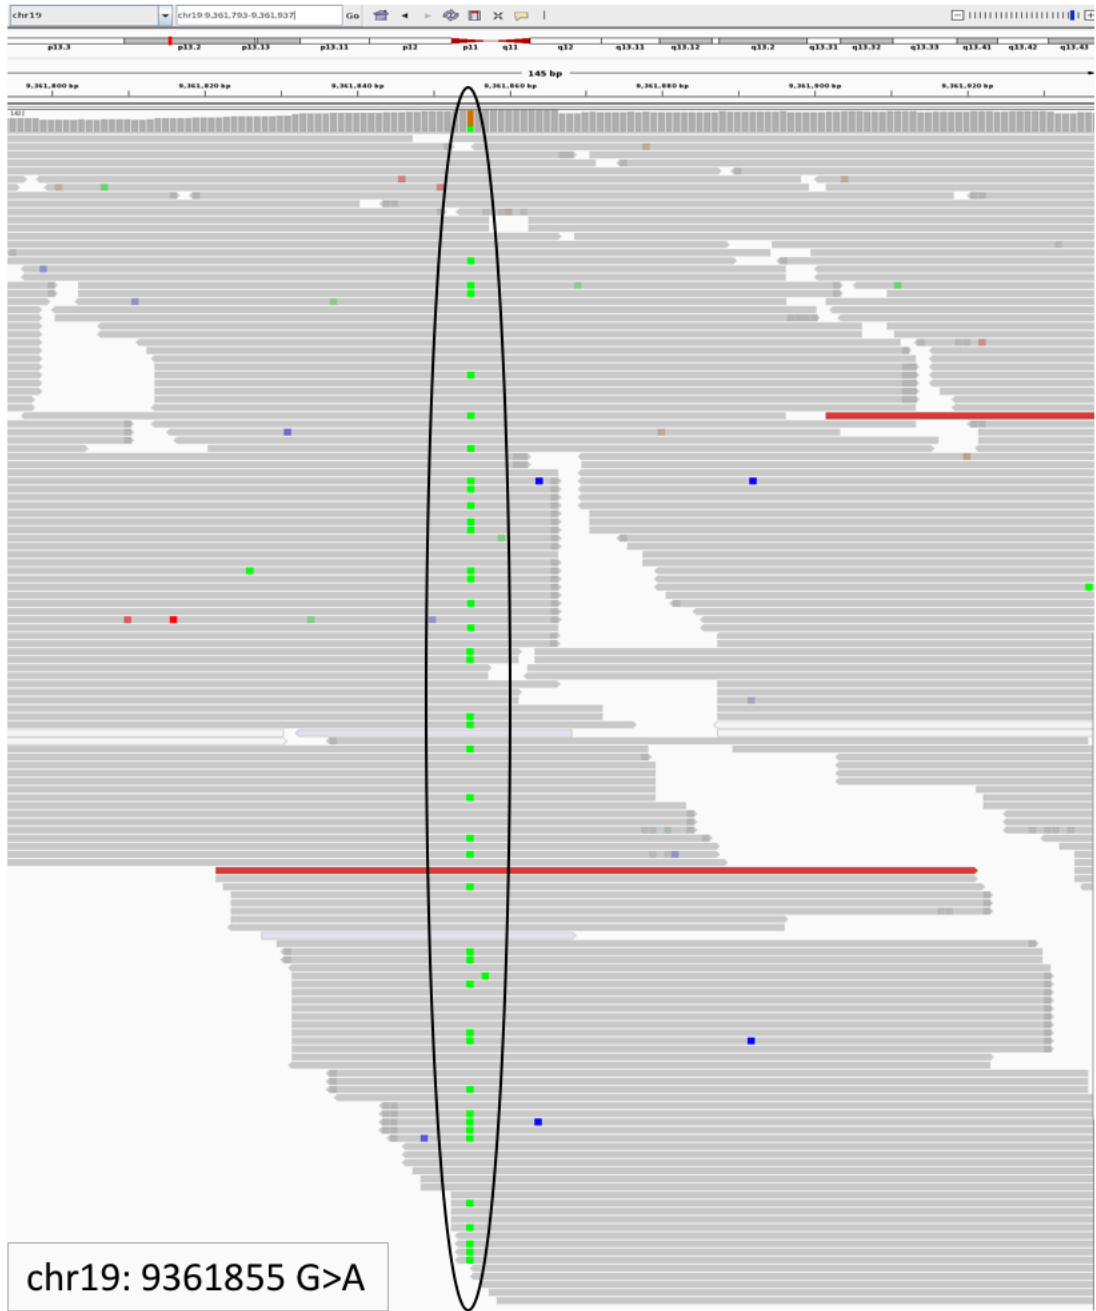

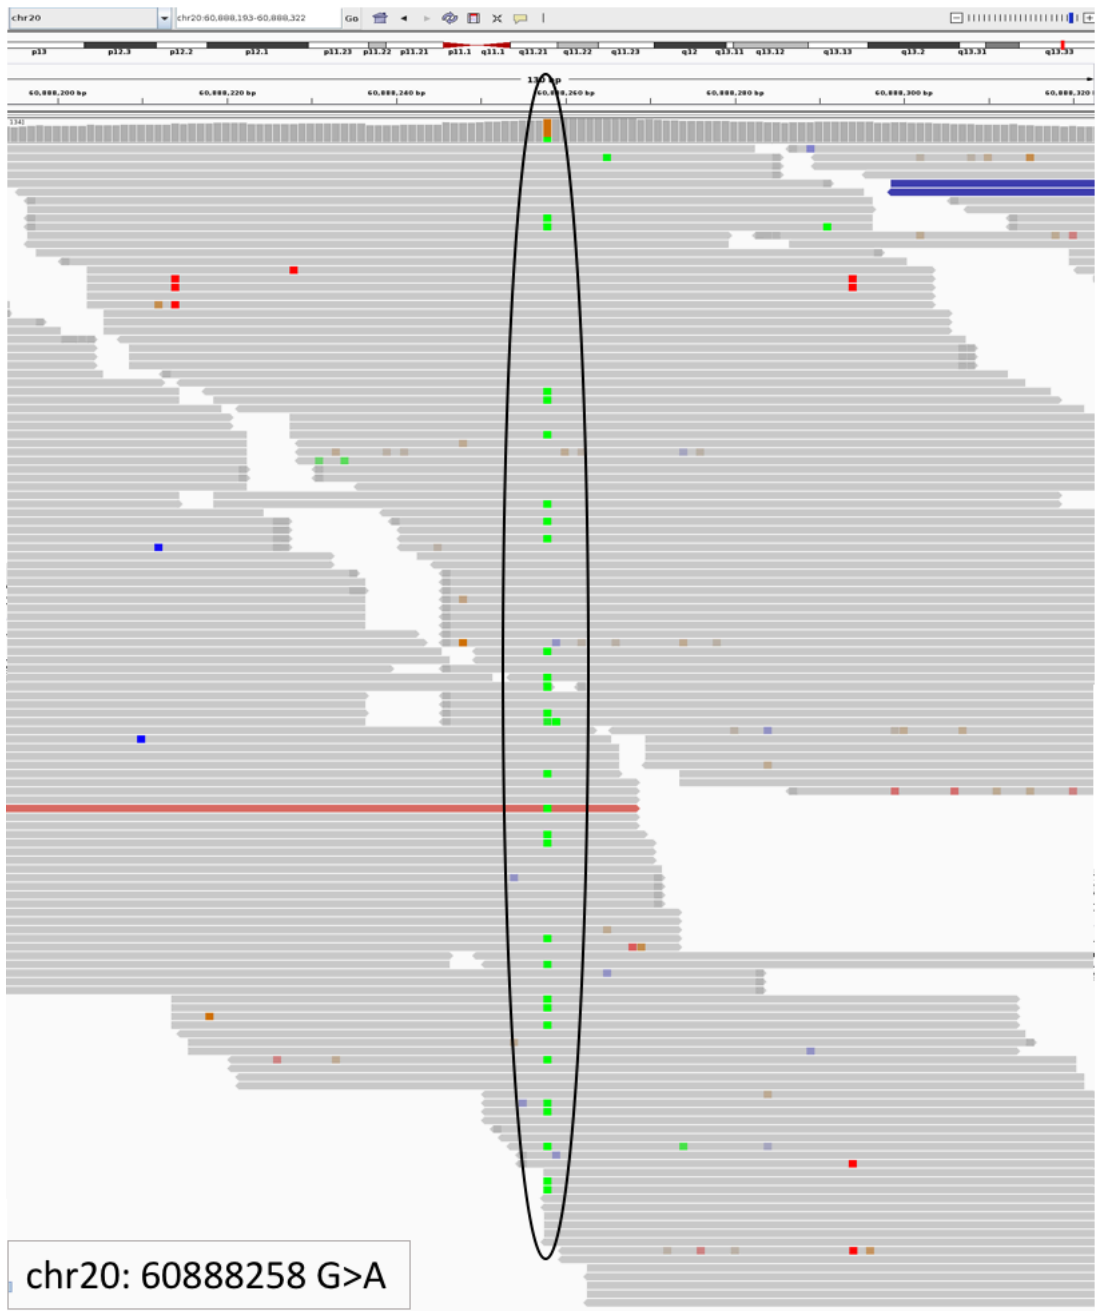

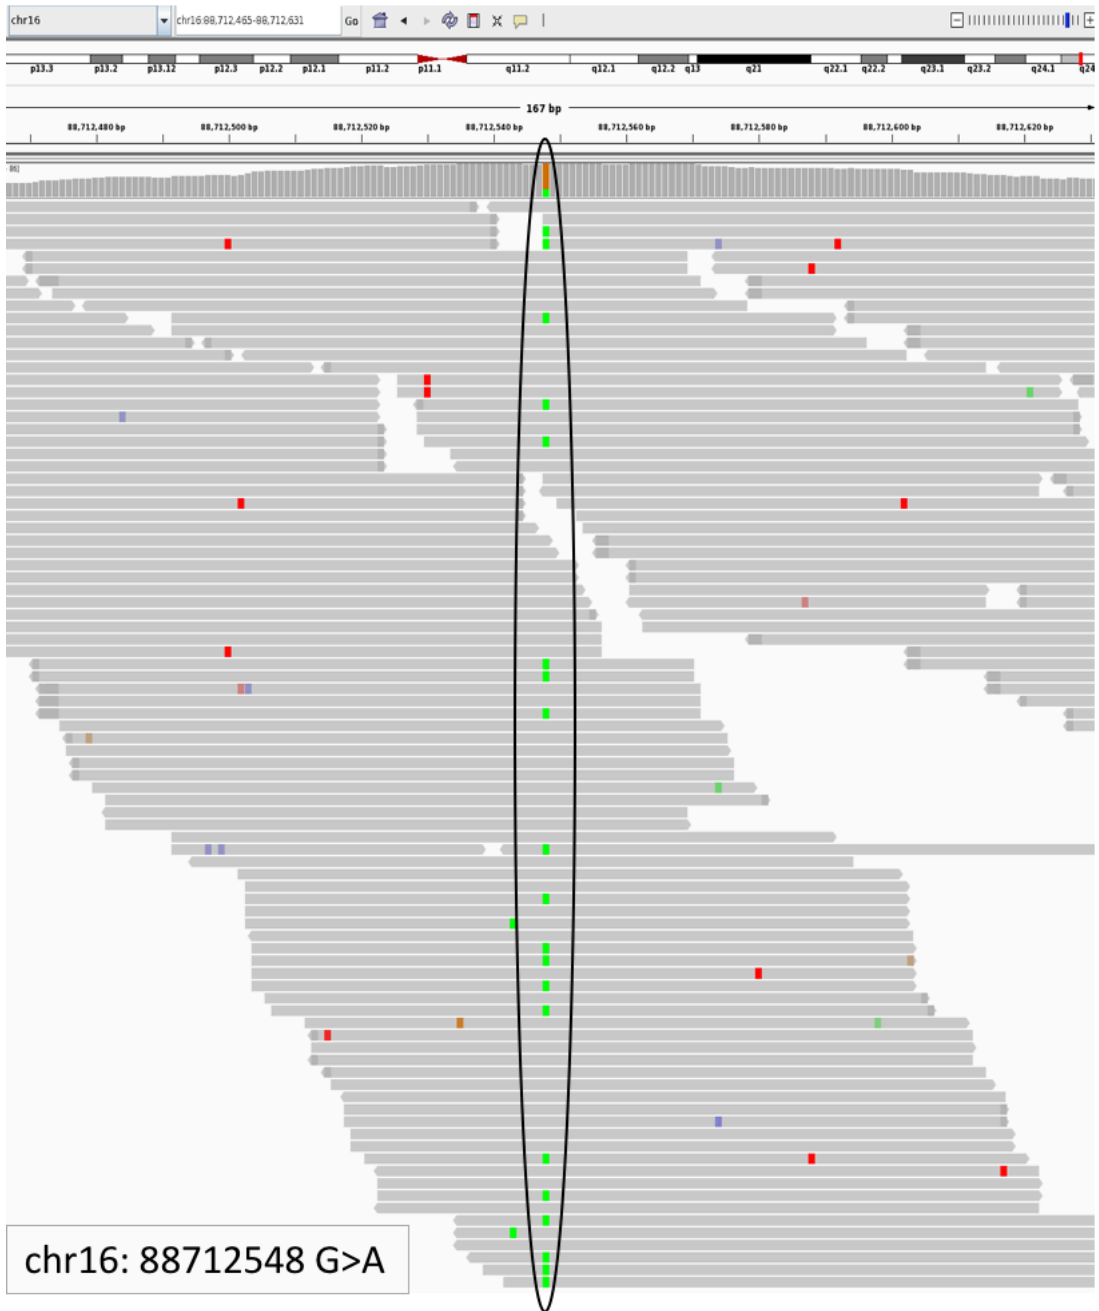

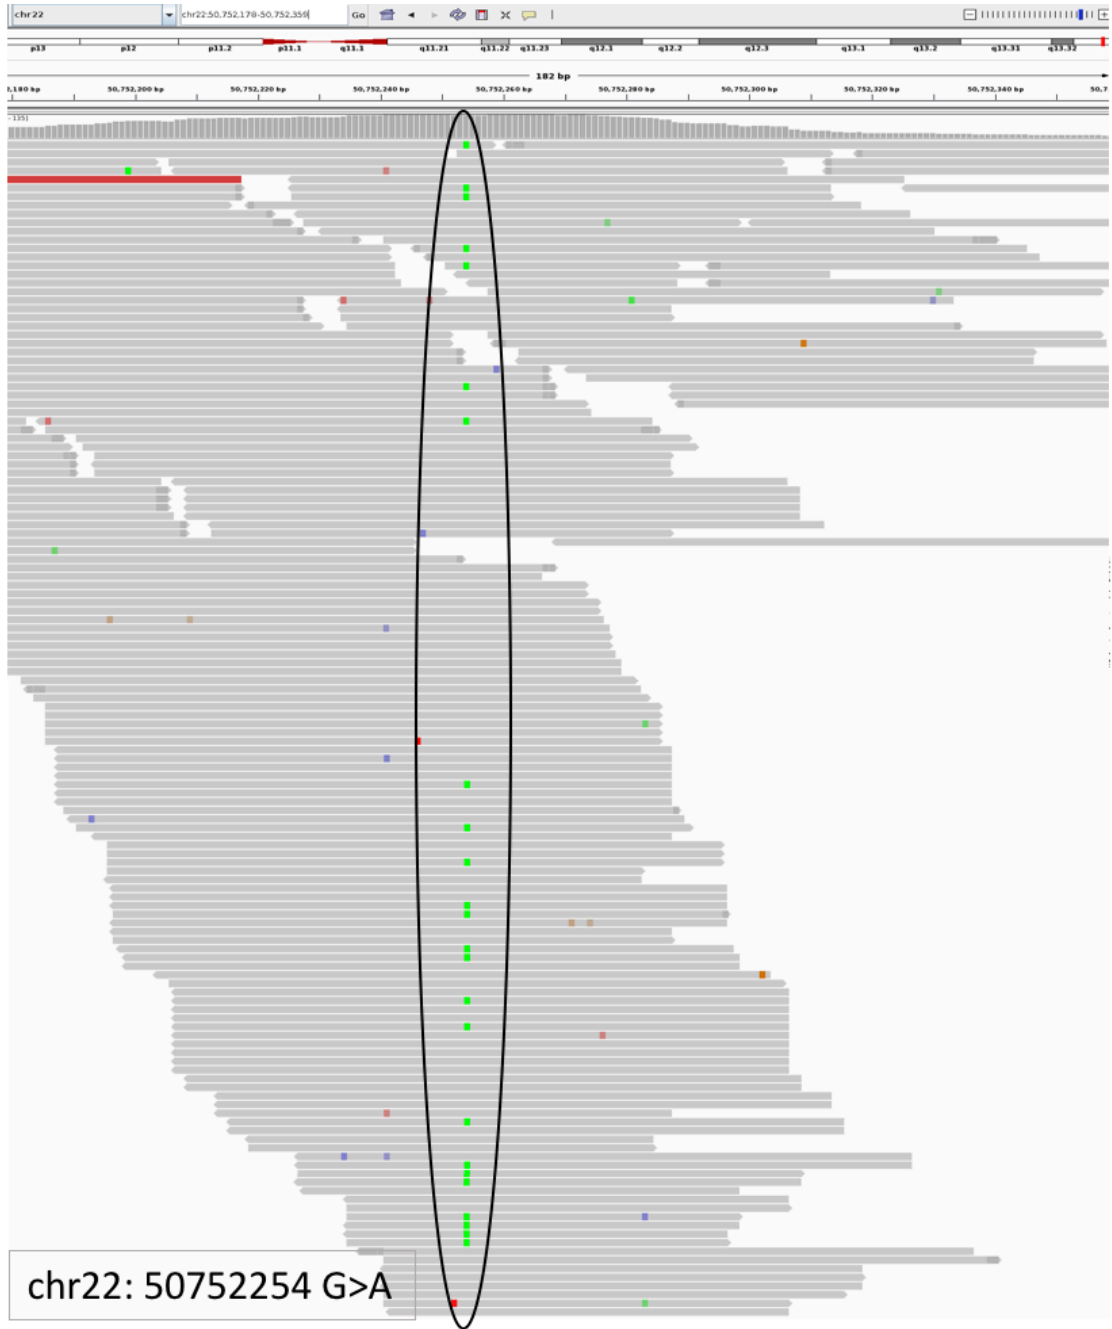

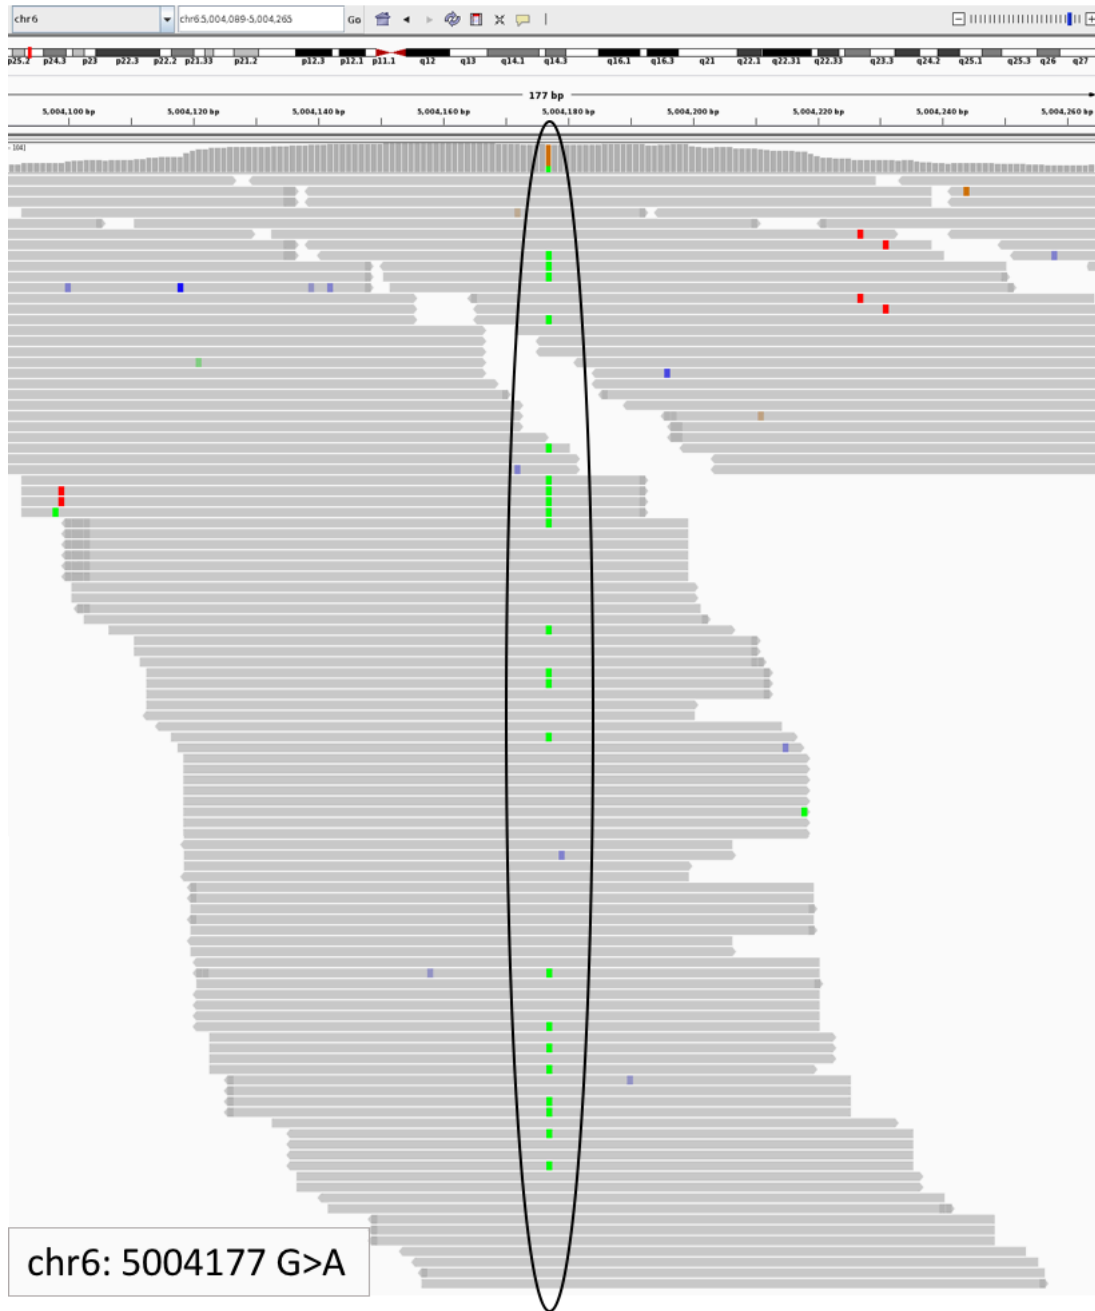

**Supplementary Figure 4.** The IGV browser images of validated somatic variants that were realigned in response to the anonymous reviewer. The position and allele change of each somatic variant is shown at the bottom of the image.
